# Supplementary material for: Preparation of a Montmorillonite-Modified Chitosan Film-Loaded Palladium Heterogeneous Catalyst and its Application in the Preparation of Biphenyl Compounds
Source: MDPI journal article supplement (doi:10.3390/molecules27248984), 2022-12-16
Supplement: s1 [file s1]

## Table of Contents

|    |                                                                                                                       |     |
|----|-----------------------------------------------------------------------------------------------------------------------|-----|
| 1. | Table <b>S1</b> Mixing ratio of CS/PVA/MMT blended film                                                               | S1  |
| 2. | Table <b>S2</b> Mechanical properties of CS, PVA, and CS/PVA blended film                                             | S1  |
| 3. | Figure <b>S1</b> Adsorption of Pd <sup>2+</sup> by CS/PVA/MMT is consistent with the pseudo–frist–order kinetic model | S2  |
| 4. | Figure <b>S2</b> Adsorption of Pd <sup>2+</sup> by CS/PVA/MMT is consistent with the Weber Morris model model         | S3  |
| 5. | Figure <b>S3</b> FTIR spectra of CS/PVA/MMT @Pd                                                                       | S4  |
| 6. | Figure <b>S4</b> X–ray diffraction patterns of CS/PVA/MMT @Pd (after one reaction)                                    | S5  |
| 7. | Characterization data for products ( <b>3a– 3ab</b> )                                                                 | S6  |
| 8. | Fig. <b>S5–S32</b> <sup>1</sup> H NMR and <sup>13</sup> C NMR spectra of products ( <b>3a– 3ab</b> )                  | S12 |

**Table S1.** Mixing ratio of CS/PVA/MMT blended film.

| Entry                | 1     | 2     | 3     | 4     | 5     |
|----------------------|-------|-------|-------|-------|-------|
| 2% CS/ mL            | 10    | 10    | 10    | 10    | 10    |
| 2% PVA/ mL           | 10    | 10    | 10    | 10    | 10    |
| MMT/(g)              | 0.020 | 0.040 | 0.060 | 0.080 | 0.100 |
| H <sub>2</sub> O/ mL | 30    | 30    | 30    | 30    | 30    |

**Table S2.** Mechanical properties of CS, PVA, and CS/PVA blended film.

| Entry |                           | Elongation at break<br>/% | Tensile strength<br>(MPa) |
|-------|---------------------------|---------------------------|---------------------------|
| 1     | CS                        | 1.21 ± 0.35               | 22.33 ± 4.33              |
| 2     | PVA                       | 12.90 ± 1.44              | 75.87 ± 2.56              |
| 3     | CS:PVA = (1:1)            | 10.07 ± 1.53              | 62.92 ± 6.28              |
| 4     | CS:PVA:MMT =<br>(1:1:0.1) | 8.70 ± 1.23               | 50.12 ± 7.87              |
| 5     | CS:PVA:MMT =<br>(1:1:0.2) | 7.20 ± 0.85               | 42.55 ± 6.63              |
| 6     | CS:PVA:MMT =<br>(1:1:0.3) | 5.26 ± 1.10               | 38.54 ± 3.70              |
| 7     | CS:PVA:MMT =<br>(1:1:0.4) | 3.02 ± 1.11               | 30.01 ± 8.64              |
| 87    | CS:PVA:MMT =<br>(1:1:0.5) | 2.67 ± 1.24               | 25.92 ± 3.28              |

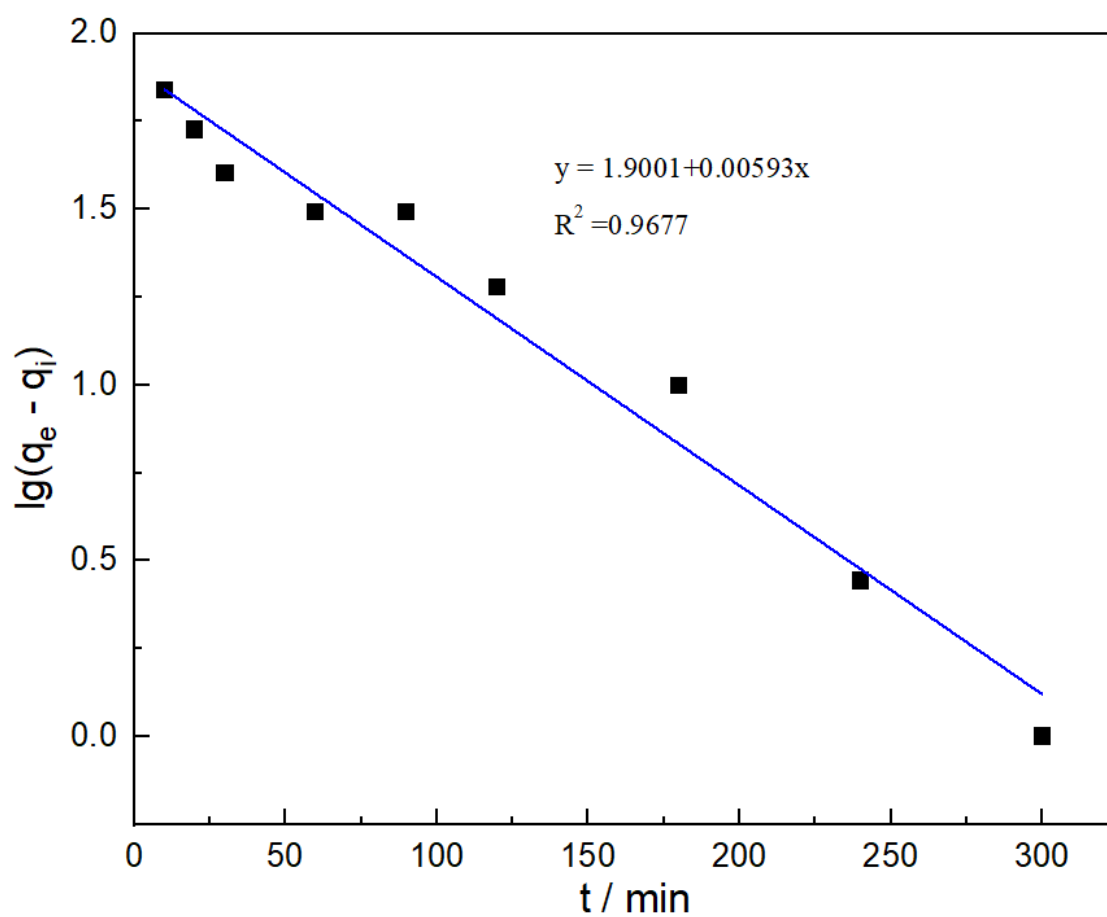

Figure S1. Adsorption of  $\text{Pd}^{2+}$  by CS/PVA/MMT is consistent with the pseudo-first-order kinetic.

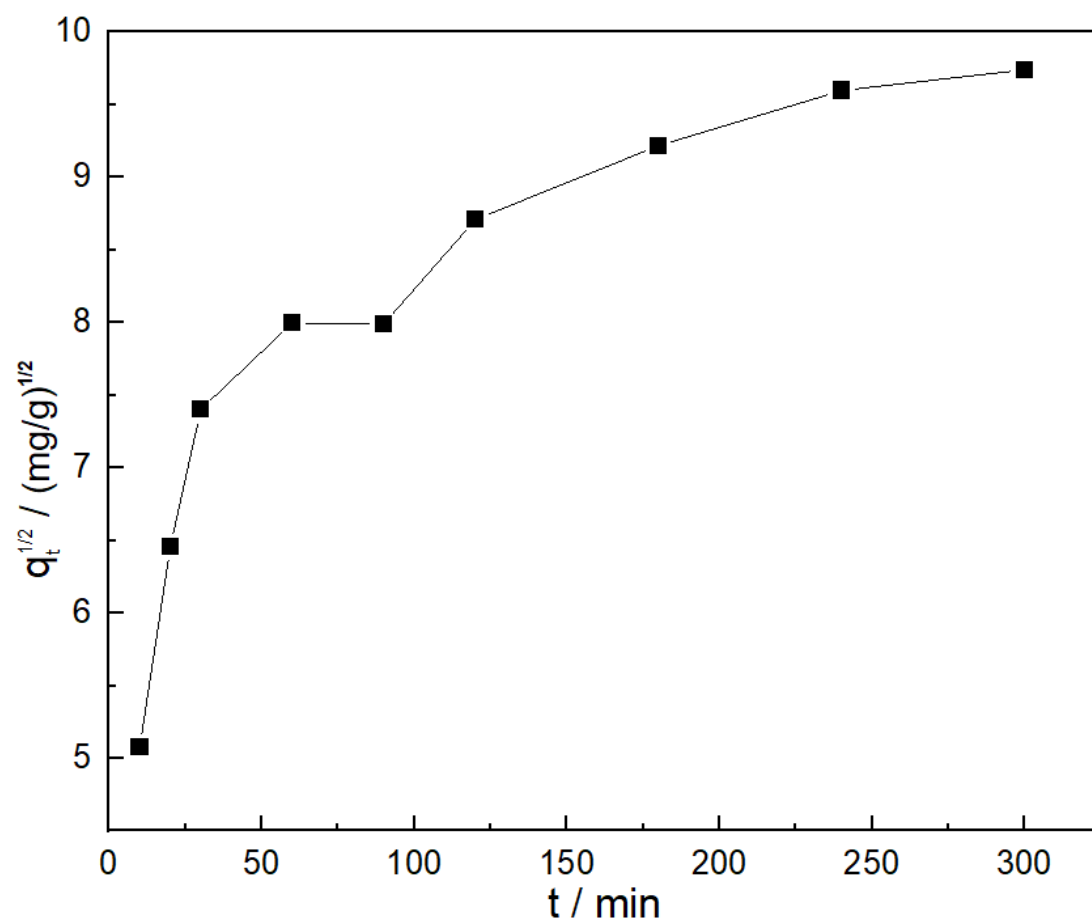

**Figure S2.** Adsorption of  $\text{Pd}^{2+}$  by CS/PVA/MMT is consistent with the Weber Morris mode.

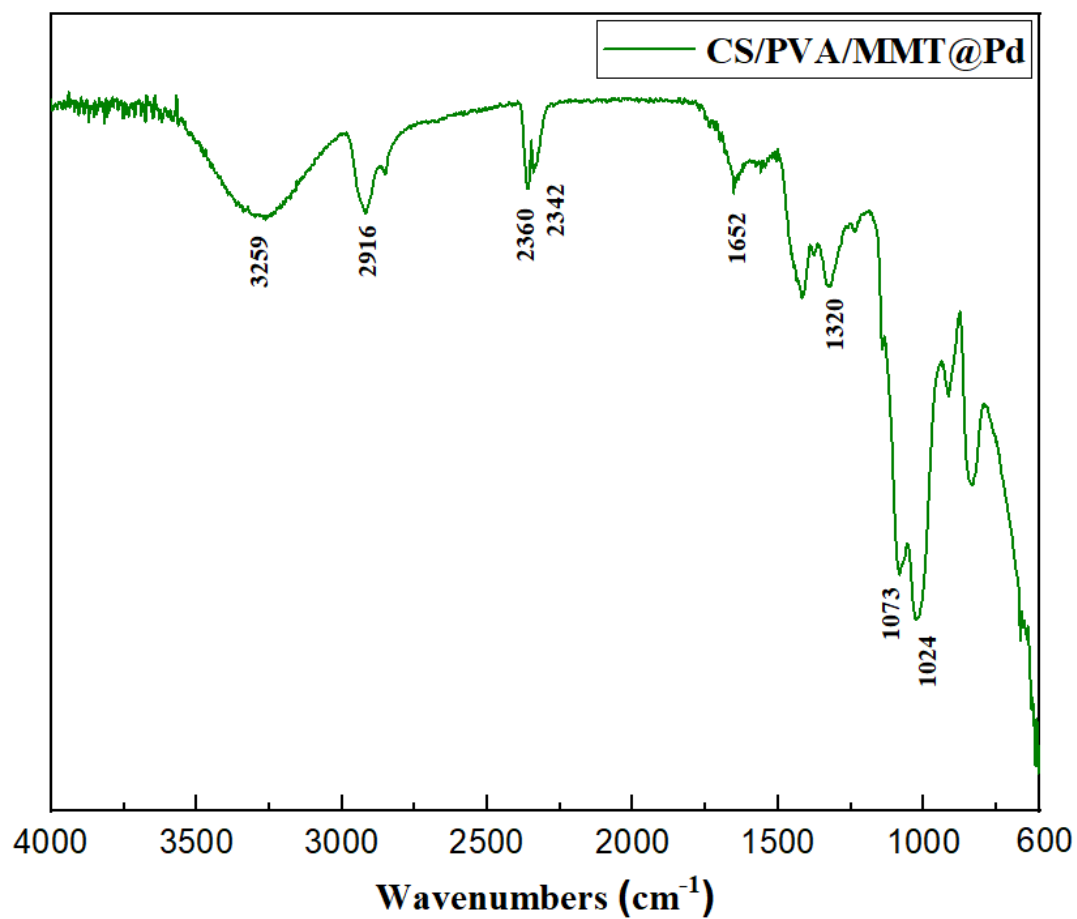

Figure S3. FTIR spectra of CS/PVA/MMT @Pd.

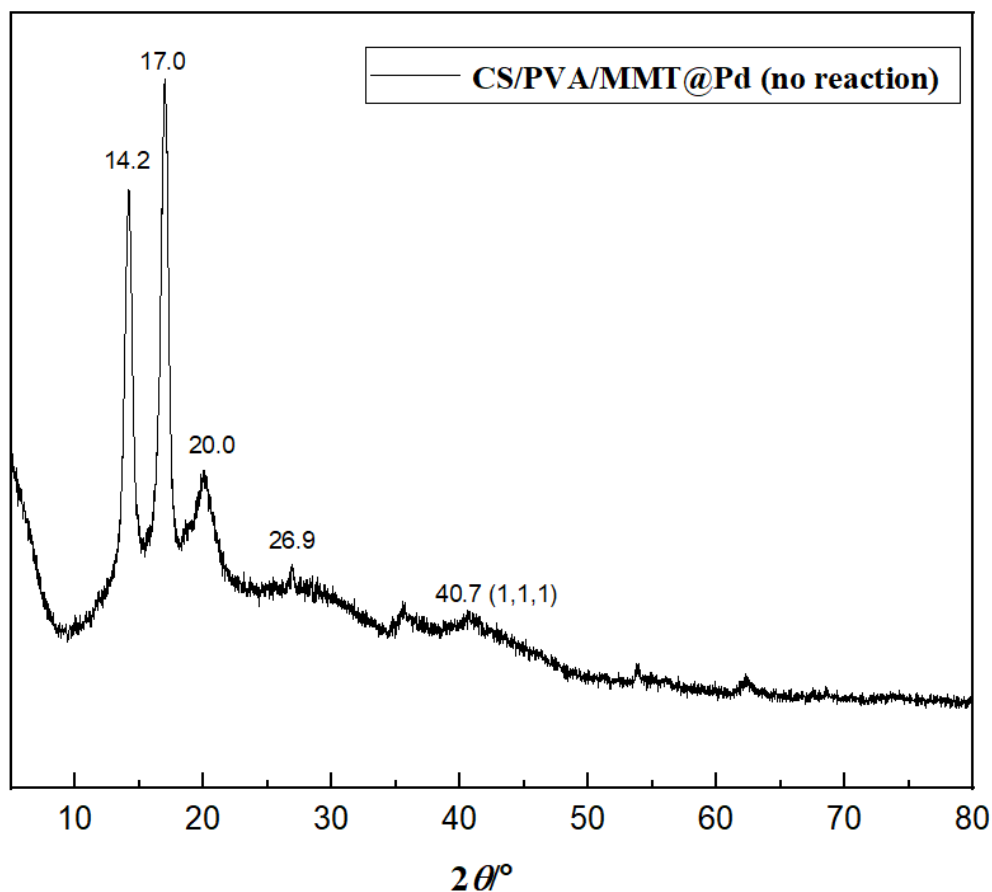

Figure S4. X-ray diffraction patterns of CS/PVA/MMT @Pd (after one reaction).

### 3. Characterization data for products

#### 3a 3,4'-dimethoxy-1,1'-biphenyl

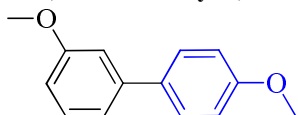

$^1\text{H}$  NMR (400 MHz,  $\text{CDCl}_3$ , ppm)  $\delta$  = 7.57–7.54(m, 2H), 7.38–7.34(t,  $J$  = 8.0 Hz, 2H), 7.18–7.16(d,  $J$  = 7.6 Hz, 1H), 7.12–7.11(t,  $J$  = 2.0 Hz, 1H), 7.01–6.99(m, 2H), 6.90–6.87(dd,  $J$  = 8.2 Hz, 2.6 Hz, 1H), 3.88(s, 3H), 3.87(s, 3H).

$^{13}\text{C}$  NMR (100 MHz,  $\text{CDCl}_3$ , ppm)  $\delta$  = 159.84, 159.16, 142.27, 133.51, 129.66, 128.13, 119.21, 114.09, 112.44, 111.93, 55.28, 55.21.

#### 3b 4'-methoxy-2-methyl-1,1'-biphenyl

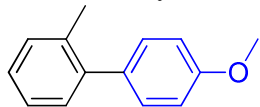

$^1\text{H}$  NMR (400 MHz,  $\text{CDCl}_3$ , ppm)  $\delta$  = 7.18–7.13(m, 6H), 6.87–6.85(d,  $J$  = 8.8 Hz, 1H), 3.76(s, 3H), 2.19(s, 3H).

$^{13}\text{C}$  NMR (100 MHz,  $\text{CDCl}_3$ , ppm)  $\delta$  = 158.42, 141.46, 135.42, 134.28, 130.25, 130.20, 129.85, 126.92, 125.71, 113.41, 55.22, 20.54.

#### 3c 4'-methoxy-3-methyl-1,1'-biphenyl

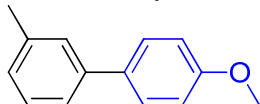

$^1\text{H}$  NMR (400 MHz,  $\text{CDCl}_3$ , ppm)  $\delta$  = 7.55–7.51(m, 2H), 7.38–7.36(d,  $J$  = 9.0 Hz, 2H), 7.43–7.30(t,  $J$  = 7.2 Hz, 1H), 7.14–7.13 d,  $J$  = 7.2Hz, 1H), 7.00–6.96(m, 2H), 3.86(s, 3H), 2.42(s, 3H).  
 $^{13}\text{C}$  NMR (101 MHz,  $\text{CDCl}_3$ , ppm)  $\delta$  = 158.99, 140.75, 138.25, 133.83, 128.60, 128.13, 127.53, 127.38, 123.81, 114.08, 55.31, 21.55.

### 3d 4-methoxy-4'-methyl-1,1'-biphenyl

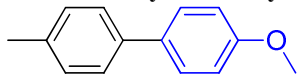

$^1\text{H}$  NMR (400 MHz,  $\text{CDCl}_3$ , ppm)  $\delta$  = 7.44–7.40(m, 2H), 7.37–7.35(m, 2H), 7.15–7.12(d,  $J$ =8.0 Hz, 2H), 6.89–6.86(m, 2H), 3.75(s, 3H), 2.29(s, 3H).  
 $^{13}\text{C}$  NMR (100 MHz,  $\text{CDCl}_3$ , ppm)  $\delta$  = 158.89, 137.92, 136.28, 133.69, 129.40, 127.90, 126.53, 114.12, 55.27, 21.01.

### 3e 4'-methoxy-2,6-dimethyl-1,1'-biphenyl

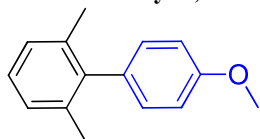

$^1\text{H}$  NMR (400 MHz,  $\text{CDCl}_3$ , ppm)  $\delta$  = 7.18–7.15(m, 1H), 7.12–7.07(m, 4H), 6.99–6.97(m, 4H), 3.87(s, 3H), 2.06(s, 3H).  
 $^{13}\text{C}$  NMR (100 MHz,  $\text{CDCl}_3$ , ppm)  $\delta$  = 158.17, 141.46, 136.50, 133.24, 130.02, 127.20, 126.85, 113.74, 55.18, 20.91.

### 3f 4'-methoxy-[1,1'-biphenyl]-4-carbonitrile

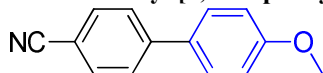

$^1\text{H}$  NMR (400 MHz,  $\text{CDCl}_3$ , ppm)  $\delta$  = 7.69–7.62(m, 4H), 7.55–7.52(m, 2H), 7.02–6.99(m, 2H), 3.86(s, 3H).  
 $^{13}\text{C}$  NMR (100 MHz,  $\text{CDCl}_3$ , ppm)  $\delta$  = 160.09, 145.10, 132.48, 131.36, 128.27, 127.00, 119.04, 114.45, 109.96, 55.32.

### 3g 4'-methoxy-[1,1'-biphenyl]-4-carbaldehyde

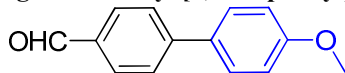

$^1\text{H}$  NMR (400 MHz,  $\text{CDCl}_3$ , ppm)  $\delta$  = 10.03(s, 1H), 7.94–7.91(dt,  $J$  = 8.4 Hz, 1.8 Hz, 2H), 7.73–7.70(dt,  $J$  = 8.4 Hz, 1.8 Hz, 2H), 7.62–7.58(m, 2H), 7.03–7.00(m, 2H), 3.87(s, 3H).  
 $^{13}\text{C}$  NMR (100 MHz,  $\text{CDCl}_3$ , ppm)  $\delta$  = 191.89, 160.07, 146.76, 134.63, 132.03, 130.30, 128.48, 127.03, 114.45, 55.38.

### 3h 4-chloro-4'-methoxy-1,1'-biphenyl

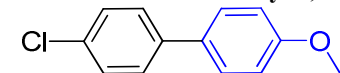

$^1\text{H}$  NMR (400 MHz,  $\text{CDCl}_3$ , ppm)  $\delta$  = 7.50–7.46(m, 4H), 7.40–7.36(m, 2H), 7.62–7.58(m, 2H), 3.85(s, 3H).  
 $^{13}\text{C}$  NMR (100MHz,  $\text{CDCl}_3$ , ppm)  $\delta$  = 159.33, 139.24, 132.64, 132.47, 128.81, 127.99, 127.91, 114.28, 55.35.

### 3i methyl 4'-methoxy-[1,1'-biphenyl]-4-carboxylate

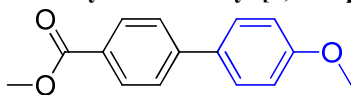

$^1\text{H}$  NMR (400 MHz,  $\text{CDCl}_3$ , ppm)  $\delta$  = 8.09–8.06 (m, 2H), 7.64–7.56(m, 4H), 7.01–6.98 (m, 2H), 3.93(s, 3H), 3.85(s, 3H).  
 $^{13}\text{C}$  NMR (100 MHz,  $\text{CDCl}_3$ , ppm)  $\delta$  = 167.07, 159.76, 145.16, 132.34, 130.07, 128.33, 128.15, 126.43, 114.32, 55.35, 52.09.

### 3j (4'-methoxy-[1,1'-biphenyl]-4-yl)methanol

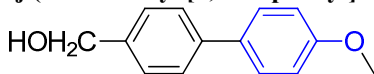

$^1\text{H}$  NMR (400 MHz,  $\text{CDCl}_3$ , ppm)  $\delta$  = 7.57–7.51 (m, 4H), 7.43–7.41(d,  $J$  = 8.2 Hz, 2.0 Hz, 1H), 6.87–6.83 (m, 2H), 6.72–7.70(d,  $J$  = 8.2 Hz, 1H), 3.98(s, 2H), 3.74(s, 3H).  
 $^{13}\text{C}$  NMR (100 MHz,  $\text{CDCl}_3$ , ppm)  $\delta$  = 159.13, 140.23, 139.18, 133.30, 128.07, 127.48, 126.86, 114.18, 65.15, 55.34.

### 3k 3-chloro-3'-methoxy-[1,1'-biphenyl]-4-amine

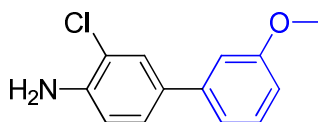

$^1\text{H}$  NMR (400 MHz,  $\text{CDCl}_3$ , ppm)  $\delta$  = 7.37–7.32 (m, 2H), 7.19–7.16 (dd,  $J$  = 8.2 Hz, 2H), 7.00–6.96 (m, 2H), 4.73 (s, 2H), 3.85 (s, 3H).

$^{13}\text{C}$  NMR (100 MHz,  $\text{CDCl}_3$ , ppm)  $\delta$  = 158.64, 141.55, 132.54, 132.11, 127.37, 127.35, 125.87, 119.61, 116.08, 114.13, 55.29.

**3l 4-chloro-2-(4-methoxycyclohexa-2,4-dien-1-yl)pyrimidine**

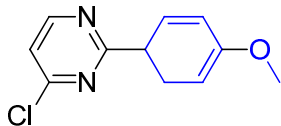

$^1\text{H}$  NMR (400 MHz,  $\text{CDCl}_3$ , ppm)  $\delta$  = 8.57–8.56 (d,  $J$  = 5.2 Hz, 1H), 8.09–8.06 (d,  $J$  = 8.8 Hz, 2H), 7.57–7.56 (d,  $J$  = 5.2 Hz, 1H), 7.02–7.00 (d,  $J$  = 8.8 Hz, 2H), 3.89 (s, 3H).

$^{13}\text{C}$  NMR (100 MHz,  $\text{CDCl}_3$ , ppm)  $\delta$  = 166.61, 162.76, 159.41, 129.13, 127.34, 114.43, 114.17, 55.48.

**3m 2-(4-methoxycyclohexa-2,4-dien-1-yl)-4-methylpyrimidine**

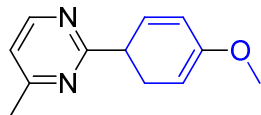

$^1\text{H}$  NMR (400 MHz,  $\text{CDCl}_3$ , ppm)  $\delta$  = 8.60–8.59 (d,  $J$  = 5.2 Hz, 1H), 8.41–8.37 (m, 2H), 7.01–6–7.98 (m, 3H), 3.88 (s, 3H), 2.57 (s, 3H).

$^{13}\text{C}$  NMR (100 MHz,  $\text{CDCl}_3$ , ppm)  $\delta$  = 167.18, 164.02, 161.67, 156.61, 130.36, 129.73, 117.89, 113.81, 99.93, 55.35, 24.45.

**3n 3-(4-methoxyphenyl)quinoline**

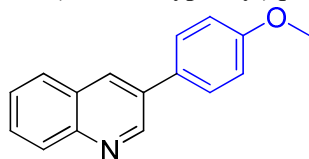

$^1\text{H}$  NMR (400 MHz,  $\text{CDCl}_3$ , ppm)  $\delta$  = 9.20–9.19 (d,  $J$  = 2.4 Hz, 1H), 8.36–8.36 (d,  $J$  = 2.4 Hz, 1H), 8.35, 8.16–8.14 (d,  $J$  = 8F.4 Hz, 1H), 8.12–8.09 (m, 2H), 7.91–7.89 (m, 1H), 7.83–7.80 (m, 2H), 7.78–7.74 (m, 1H), 7.62–7.58 (m, 1H), 2.67 (s, 3H).

$^{13}\text{C}$  NMR (100 MHz,  $\text{CDCl}_3$ , ppm)  $\delta$  = 197.62, 159.73, 149.75, 146.86, 144.27, 136.47, 133.43, 132.41, 130.18, 129.08, 129.04, 128.97, 128.47, 128.08, 127.83, 127.40, 126.93, 114.61, 55.38, 26.70.

**3o 3-(4-methoxyphenyl)thiophene**

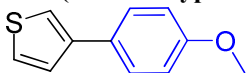

$^1\text{H}$  NMR (400 MHz,  $\text{CDCl}_3$ , ppm)  $\delta$  = 7.55–7.51 (m, 2H) 7.38–7.34 (m, 3H), 6.96–6.92 (m, 2H), 3.84 (s, 3H)

$^{13}\text{C}$  NMR (100 MHz,  $\text{CDCl}_3$ , ppm)  $\delta$  = 158.8, 141.99, 128.72, 127.57, 126.26, 126.10, 118.95, 114.17, 55.36.

**3p 5-(4-methoxyphenyl)thiophene-2-carbaldehyde**

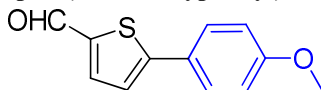

$^1\text{H}$  NMR (400 MHz,  $\text{CDCl}_3$ , ppm)  $\delta$  = 9.85 (s, 1H), 7.72–7.71 (m, 1H), 7.62–7.60 (dd,  $J$  = 6.6 Hz, 2.2 Hz, 2H), 7.30–7.29 (d,  $J$  = 4.0 Hz, 1H), 6.96–6.94 (dd,  $J$  = 6.6 Hz, 2.2 Hz, 2H), 3.85 (s, 3H)

$^{13}\text{C}$  NMR (100 MHz,  $\text{CDCl}_3$ , ppm)  $\delta$  = 182.74, 160.61, 154.50, 141.36, 137.83, 127.76, 125.66, 122.95, 114.50, 55.40.

**3q 3-methoxy-1,1'-biphenyl**

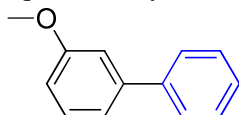

$^1\text{H}$  NMR (400 MHz,  $\text{CDCl}_3$ , ppm)  $\delta$  = 7.62–7.60 (d,  $J$  = 8.2 Hz, 2H), 7.48–7.44 (t,  $J$  = 7.2 Hz, 2H), 7.40–7.35 (m, 2H), 7.22–7.20 (dd,  $J$  = 7.6 Hz, 1.0 Hz, 1H), 7.16–7.15 (m, 1H), 6.93–6.91 (m, 1H), 3.88 (s, 3H)

$^{13}\text{C}$  NMR (100 MHz,  $\text{CDCl}_3$ , ppm)  $\delta$  = 159.84, 142.71, 141.03, 129.72, 128.70, 127.38, 127.16, 119.64, 112.82, 112.60, 55.26.

### 3r [1,1'-biphenyl]-4-ylmethanol

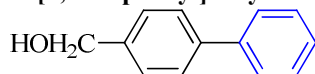

$^1\text{H}$  NMR (400 MHz,  $\text{CDCl}_3$ , ppm)  $\delta$  = 7.62–7.60 (d,  $J$  = 8.0 Hz, 4H), 7.48–7.44 (t,  $J$  = 7.8 Hz, 4H), 7.38–7.35 (t,  $J$  = 7.2 Hz, 1H), 4.74 (s, 2H).

$^{13}\text{C}$  NMR (100 MHz,  $\text{CDCl}_3$ , ppm)  $\delta$  = 140.75, 140.56, 139.81, 128.74, 127.42, 127.27, 127.04, 65.02.

### 3s 4-methyl-2-phenylpyrimidine

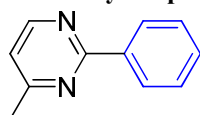

$^1\text{H}$  NMR (400 MHz,  $\text{CDCl}_3$ , ppm)  $\delta$  = 8.66–8.64 (d,  $J$  = 5.2 Hz, 1H), 8.44–8.42 (m, 2H), 7.50–7.47 (m, 3H), 7.06–7.05 (d,  $J$  = 5.2 Hz, 1H), 2.59 (s, 3H).

$^{13}\text{C}$  NMR (100 MHz,  $\text{CDCl}_3$ , ppm)  $\delta$  = 167.27, 164.35, 156.77, 137.78, 130.51, 128.51, 128.12, 118.59, 24.43.

### 3t 5-phenylthiophene-2-carbaldehyde

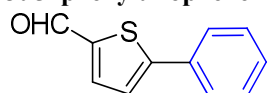

$^1\text{H}$  NMR (400 MHz,  $\text{CDCl}_3$ , ppm)  $\delta$  = 9.89 (s, 1H), 7.75–7.74 (d,  $J$  = 4.0 Hz, 1H), 7.69–7.66 (m, 2H), 7.46–7.39 (m, 4H).

$^{13}\text{C}$  NMR (100 MHz,  $\text{CDCl}_3$ , ppm)  $\delta$  = 182.80, 154.27, 142.40, 137.41, 132.99, 129.41, 129.17, 126.40, 124.06.

### 3u 5-phenylthiophene-2-carbaldehyde

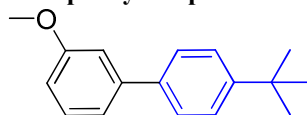

$^1\text{H}$  NMR (400 MHz,  $\text{CDCl}_3$ , ppm)  $\delta$  = 7.56–7.54 (m, 2H), 7.50–7.47 (m, 2H), 7.38–7.34 (t,  $J$  = 15.8 Hz, 1H), 7.21–7.14 (m, 2H), 6.91–6.88 (m, 1H), 3.87 (s, 3H), 1.38 (s, 9H).

$^{13}\text{C}$  NMR (100 MHz,  $\text{CDCl}_3$ , ppm)  $\delta$  = 159.84, 150.40, 142.58, 138.15, 129.65, 126.80, 125.66, 119.54, 112.71, 112.37, 55.25, 34.52, 31.35.

### 3v (4'-(tert-butyl)-[1,1'-biphenyl]-4-yl)methanol

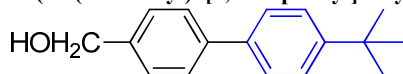

$^1\text{H}$  NMR (400 MHz,  $\text{CDCl}_3$ , ppm)  $\delta$  = 7.61–7.58 (m, 2H), 7.56–7.53 (dt,  $J$  = 8.6 Hz, 2.2 Hz, 2H), 7.49–7.46 (dt,  $J$  = 8.6 Hz, 2.2 Hz, 2H), 7.45–7.42 (dt,  $J$  = 8.6 Hz, 2.2 Hz, 2H), 7.38–7.34 (t,  $J$  = 15.8 Hz, 1H), 4.74 (s, 2H), 1.36 (s, 9H).

$^{13}\text{C}$  NMR (100 MHz,  $\text{CDCl}_3$ , ppm)  $\delta$  = 150.33, 140.46, 139.50, 137.85, 127.44, 127.16, 126.69, 125.73, 65.16, 34.52, 31.34.

### 3w 2-(4-(tert-butyl)phenyl)-4-methylpyrimidine

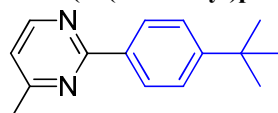

$^1\text{H}$  NMR (400 MHz,  $\text{CDCl}_3$ , ppm)  $\delta$  = 8.64–8.62 (d,  $J$  = 5.0 Hz, 1H), 8.36–8.32 (m, 2H), 7.52–7.48 (m, 2H), 7.03–7.02 (d,  $J$  = 5.0 Hz, 1H), 2.58 (s, 3H), 1.36 (s, 9H).

$^{13}\text{C}$  NMR (100 MHz,  $\text{CDCl}_3$ , ppm)  $\delta$  = 167.18, 164.38, 156.69, 153.80, 135.01, 127.87, 125.49, 118.30, 34.81, 31.23, 24.44.

### 3x 3'-methoxy-[1,1'-biphenyl]-4-carbonitrile



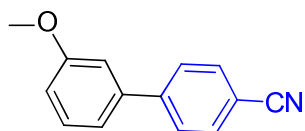

$^1\text{H}$  NMR (400 MHz,  $\text{CDCl}_3$ , ppm)  $\delta$  = 7.73–7.66(ddd,  $J$  = 18.6 Hz, 6.6 Hz, 2.2 Hz, 4H), 7.42–7.38 (t,  $J$  = 8.0 Hz, 1H), 7.18–7.15(dq,  $J$  = 7.6 Hz, 1.0 Hz, 1H), 7.11–7.10 (t,  $J$  = 2.2 Hz, 1H), 6.98–6.95(ddd,  $J$  = 8.4 Hz, 2.6 Hz, 1.0 Hz, 1H), 3.87(s, 3H).

$^{13}\text{C}$  NMR (100 MHz,  $\text{CDCl}_3$ , ppm)  $\delta$  = 160.03, 145.43, 140.54, 132.49, 130.10, 127.71, 119.57, 118.87, 113.79, 113.00, 110.91, 55.32.

### 3y 4'-(hydroxymethyl)-[1,1'-biphenyl]-4-carbonitrile

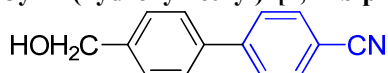

$^1\text{H}$  NMR (400 MHz,  $\text{CDCl}_3$ , ppm)  $\delta$  = 7.72–7.66(qd,  $J$  = 6.2 Hz, 1.8 Hz, 4H), 7.60–7.57 (dd,  $J$  = 6.2 Hz, 1.8 Hz, 2H), 7.49–7.47(d,  $J$  = 8.2 Hz, 2H), 4.76(s, 2H).

$^{13}\text{C}$  NMR (100 MHz,  $\text{CDCl}_3$ , ppm)  $\delta$  = 145.23, 141.41, 138.33, 132.57, 127.58, 127.55, 127.32, 118.91, 110.77, 64.71.

### 3z 4-(thiophen-3-yl)benzonitrile

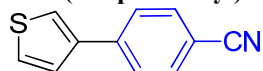

$^1\text{H}$  NMR (400 MHz,  $\text{CDCl}_3$ , ppm)  $\delta$  = 7.69(s, 4H), 7.59–7.57 (q,  $J$  = 1.4 Hz, 1H), 7.46–7.44(dd,  $J$  = 5.0 Hz, 3.0 Hz, 1H), 7.41–7.40(dd,  $J$  = 5.0 Hz, 1.4 Hz, 1H).

$^{13}\text{C}$  NMR (100 MHz,  $\text{CDCl}_3$ , ppm)  $\delta$  = 140.30, 139.96, 132.68, 127.14, 126.80, 125.89, 122.59, 118.96, 110.40.

### 3aa 4-nitro-1,1'-biphenyl

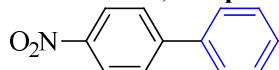

$^1\text{H}$  NMR (400 MHz,  $\text{CDCl}_3$ , ppm)  $\delta$  = 8.32–8.29(m, 2H), 7.64–7.61(m, 2H), 7.76–7.72(m, 2H), 7.53–7.43(m, 3H).

$^{13}\text{C}$  NMR (100 MHz, ppm)  $\delta$  = 147.61, 147.05, 138.74, 129.13, 128.89, 127.78, 127.36, 124.09.

### 3ab 4-methoxy-4'-nitro-1,1'-biphenyl

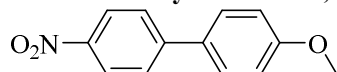

$^1\text{H}$  NMR (400 MHz,  $\text{CDCl}_3$ , ppm)  $\delta$  = 8.28–8.25(m, 2H), 7.64–7.61(m, 2H), 7.71–7.67(m, 2H), 7.60–7.56(m, 2H), 7.04–7.00(m, 2H), 3.87(s, 3H).

$^{13}\text{C}$  NMR (100 MHz, ppm)  $\delta$  = 160.40, 147.17, 146.49, 131.03, 128.54, 127.04, 124.11, 114.57, 55.40.

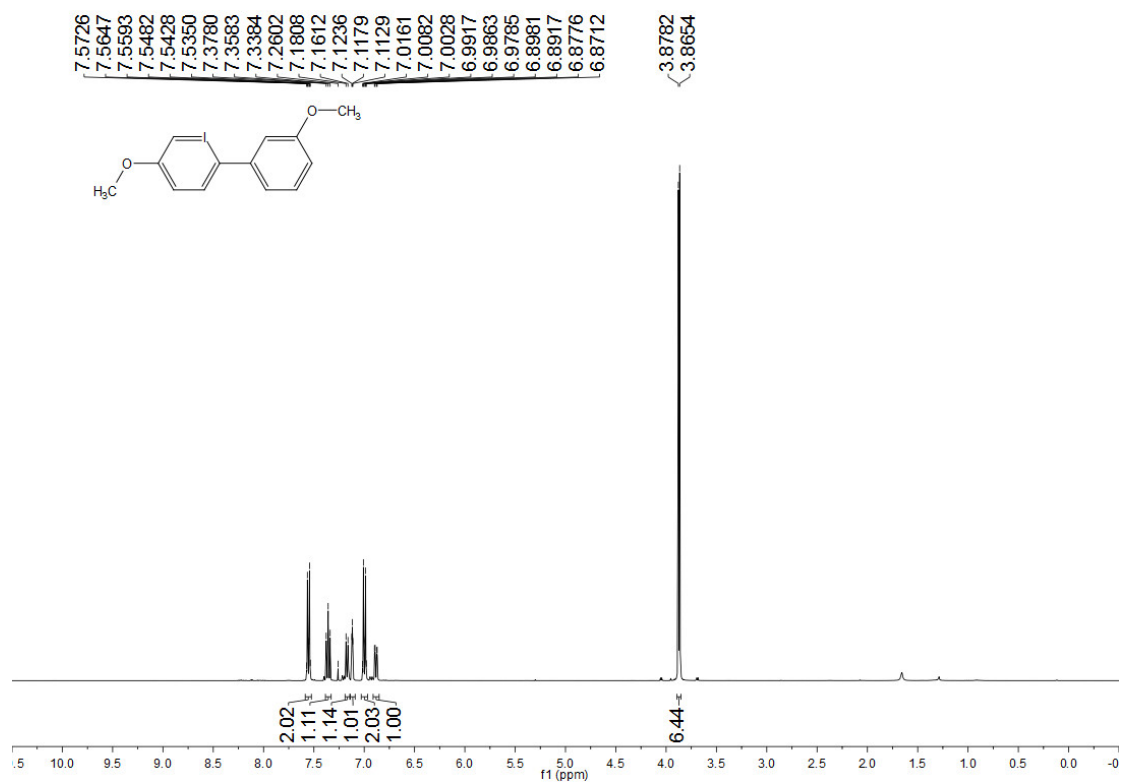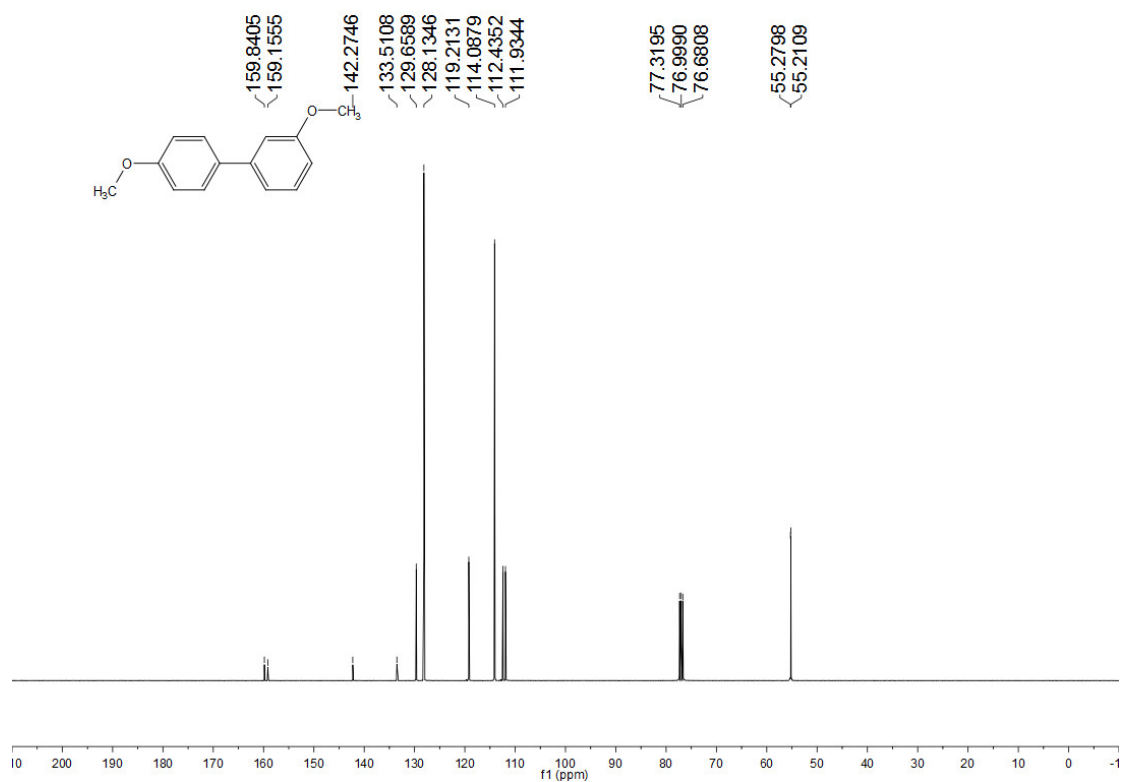

**Figure S5.** <sup>1</sup>H NMR and <sup>13</sup>C NMR spectra of 3a.

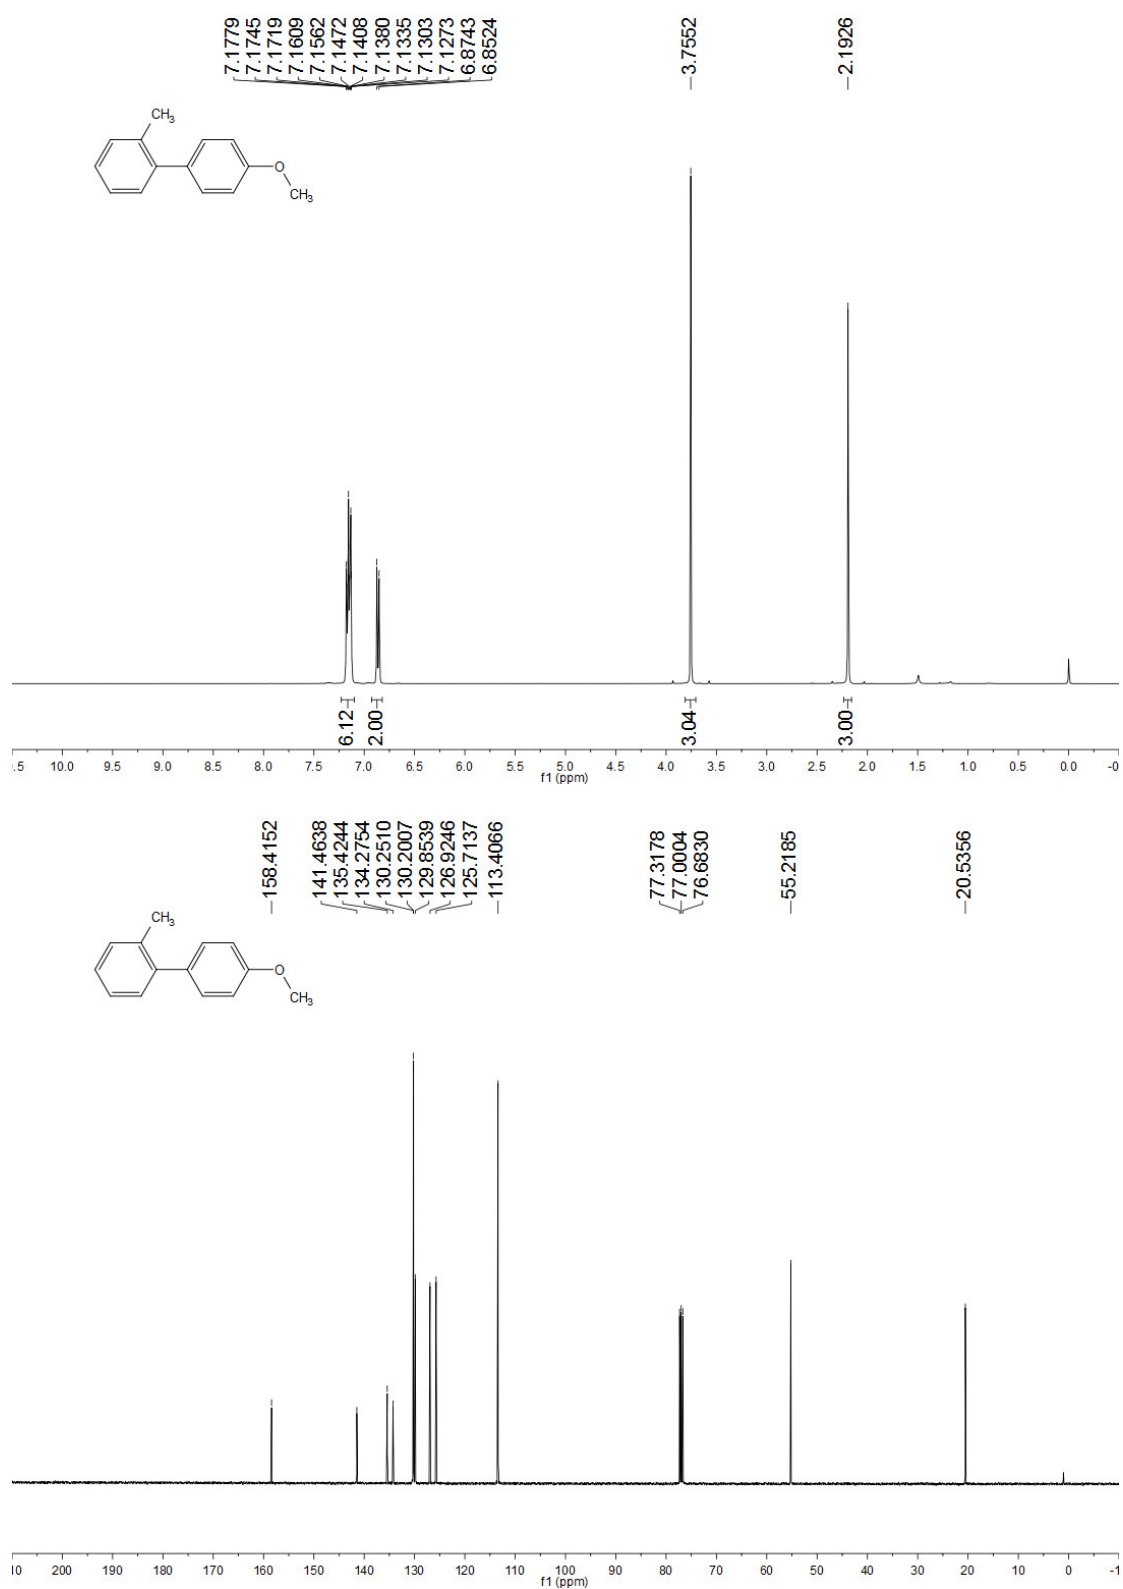

Figure S6. <sup>1</sup>H NMR and <sup>13</sup>C NMR spectra of 3b.

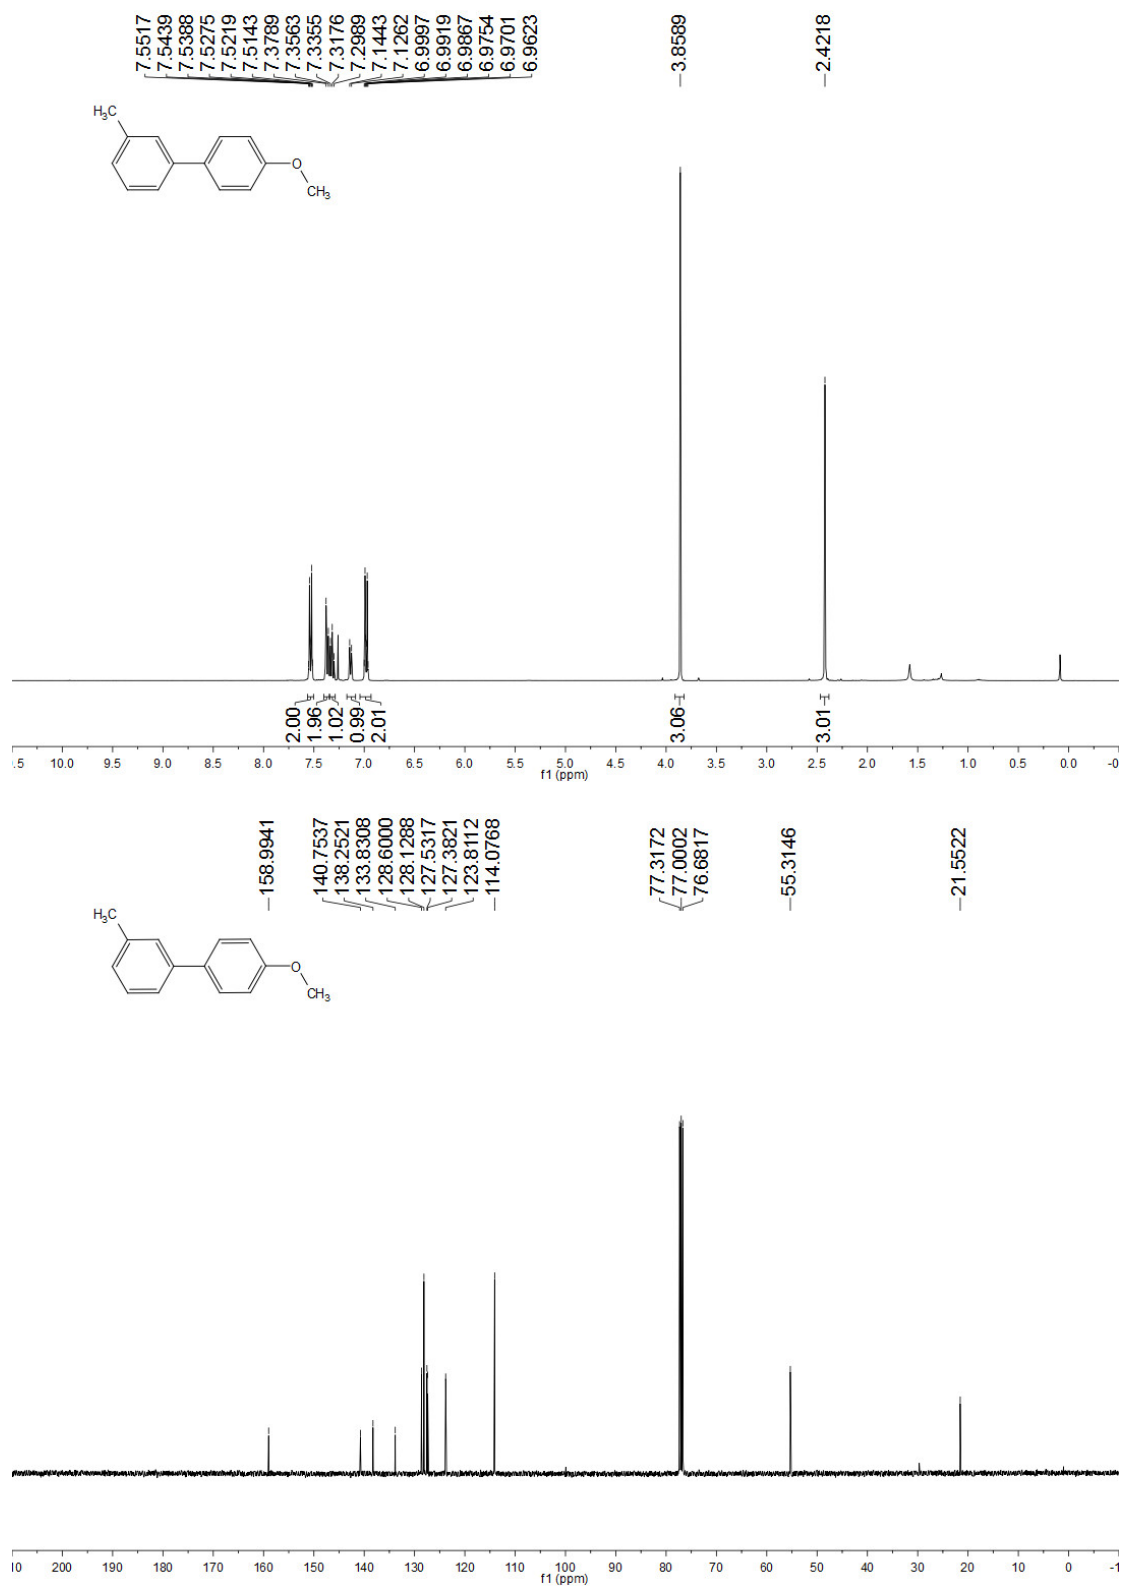

Figure S7. <sup>1</sup>H NMR and <sup>13</sup>C NMR spectra of 3c.

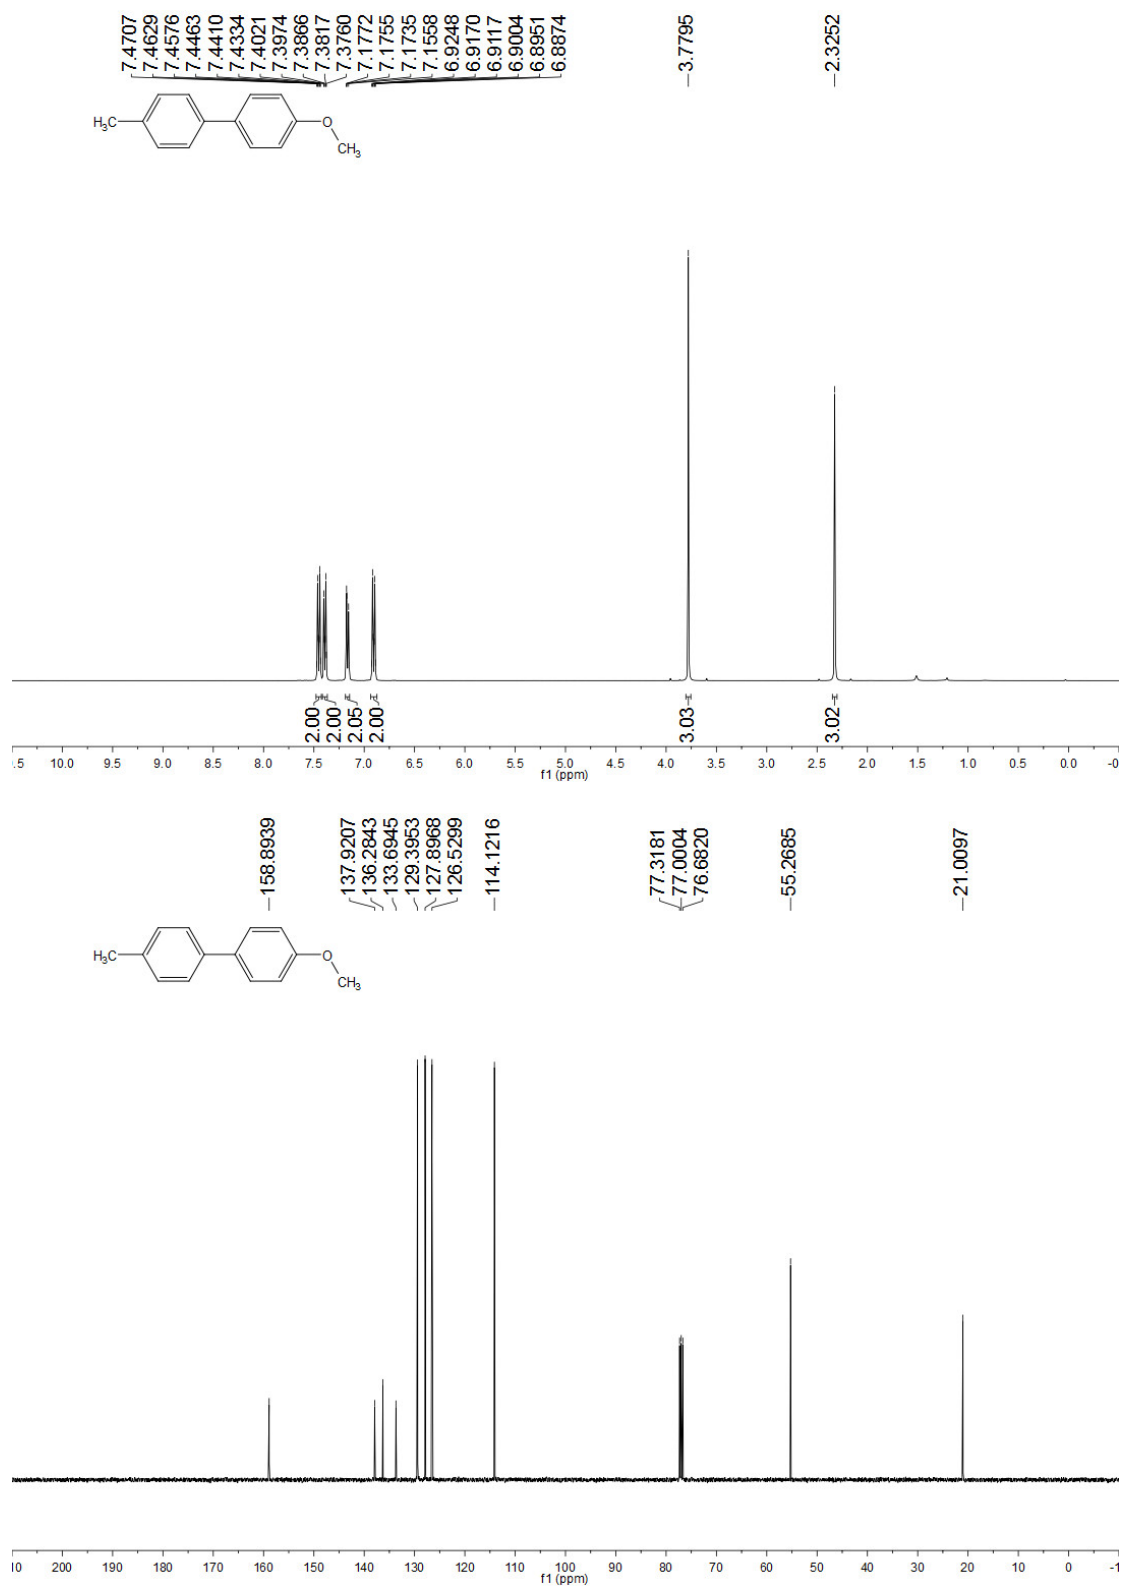

Figure S8. <sup>1</sup>H NMR and <sup>13</sup>C NMR spectra of 3d.

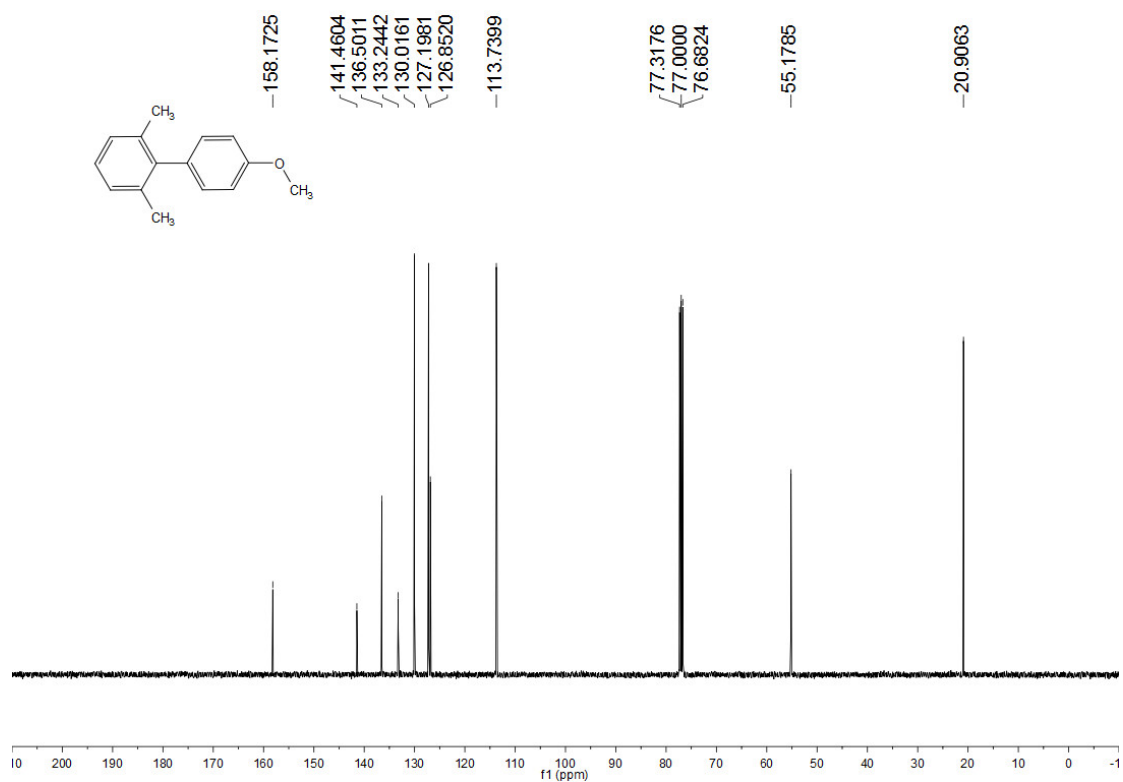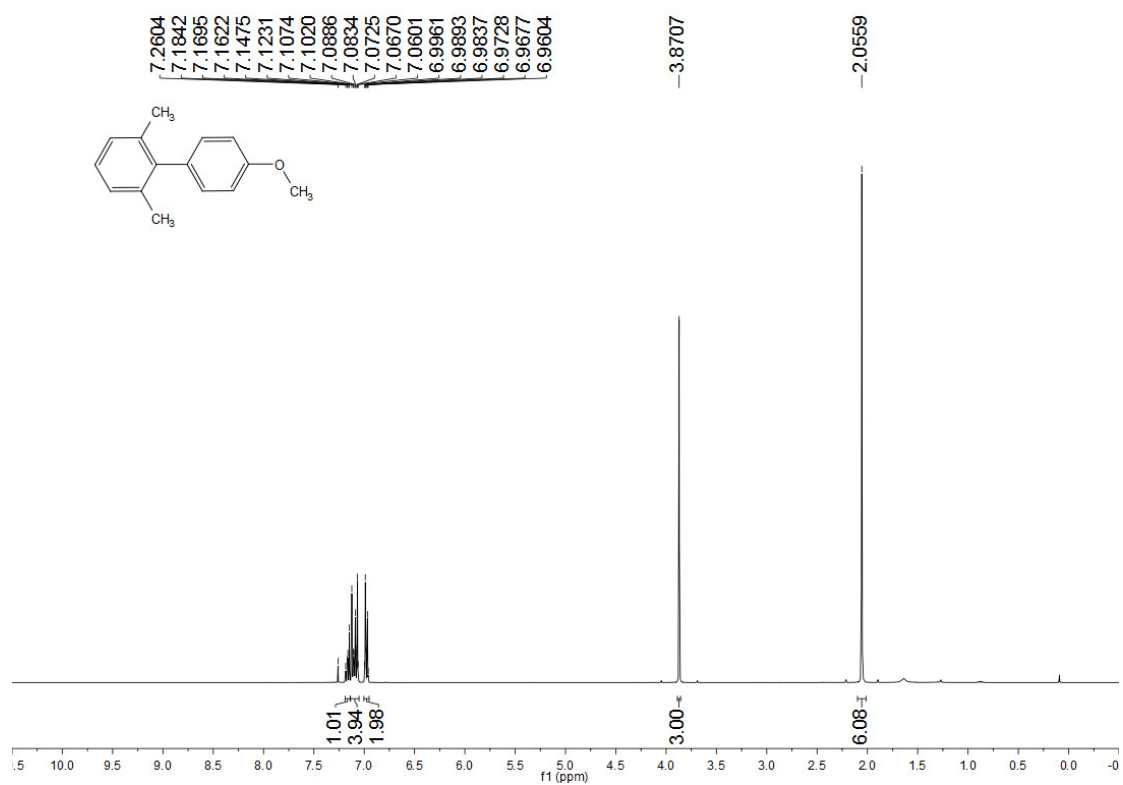

Figure S9. <sup>1</sup>H NMR and <sup>13</sup>C NMR spectra of 3e.

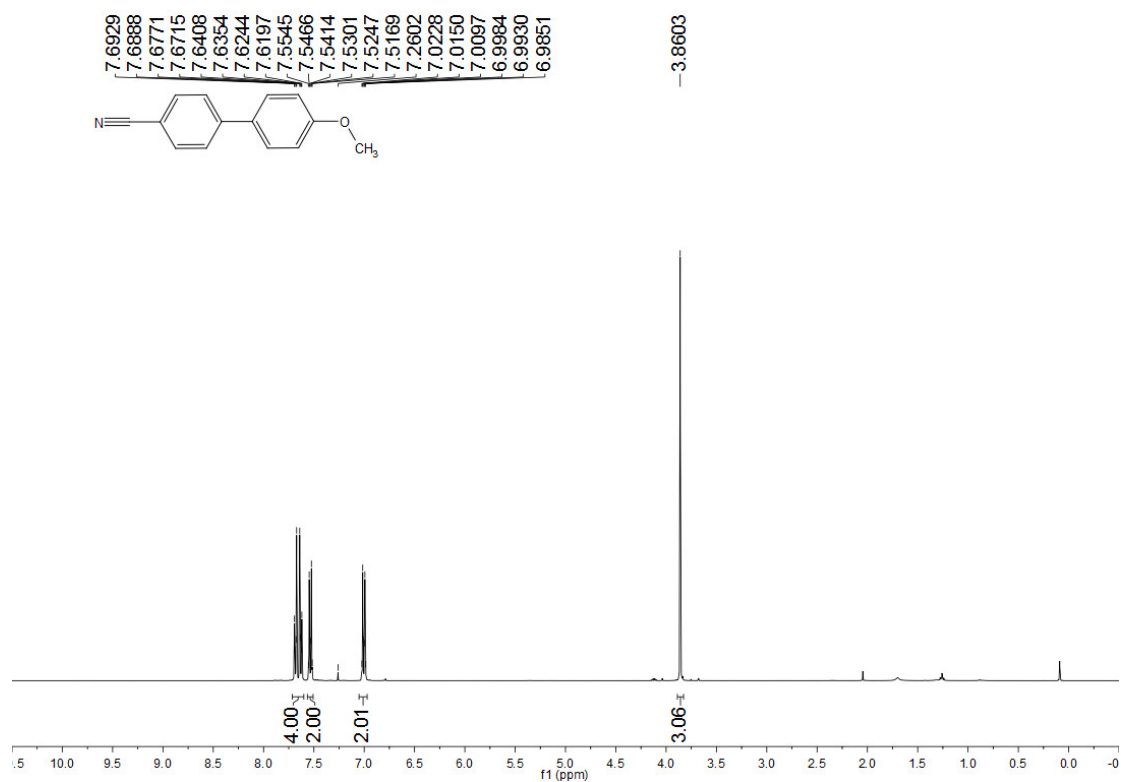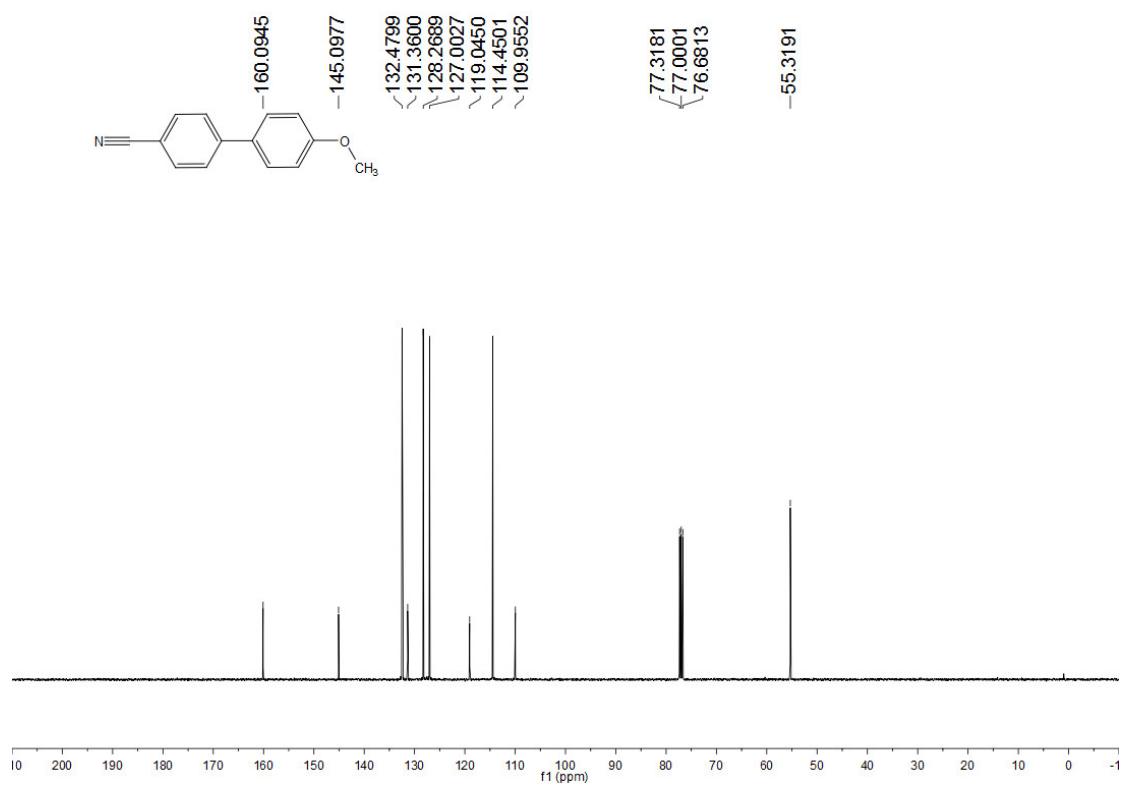

Figure S10. <sup>1</sup>H NMR and <sup>13</sup>C NMR spectra of 3f.

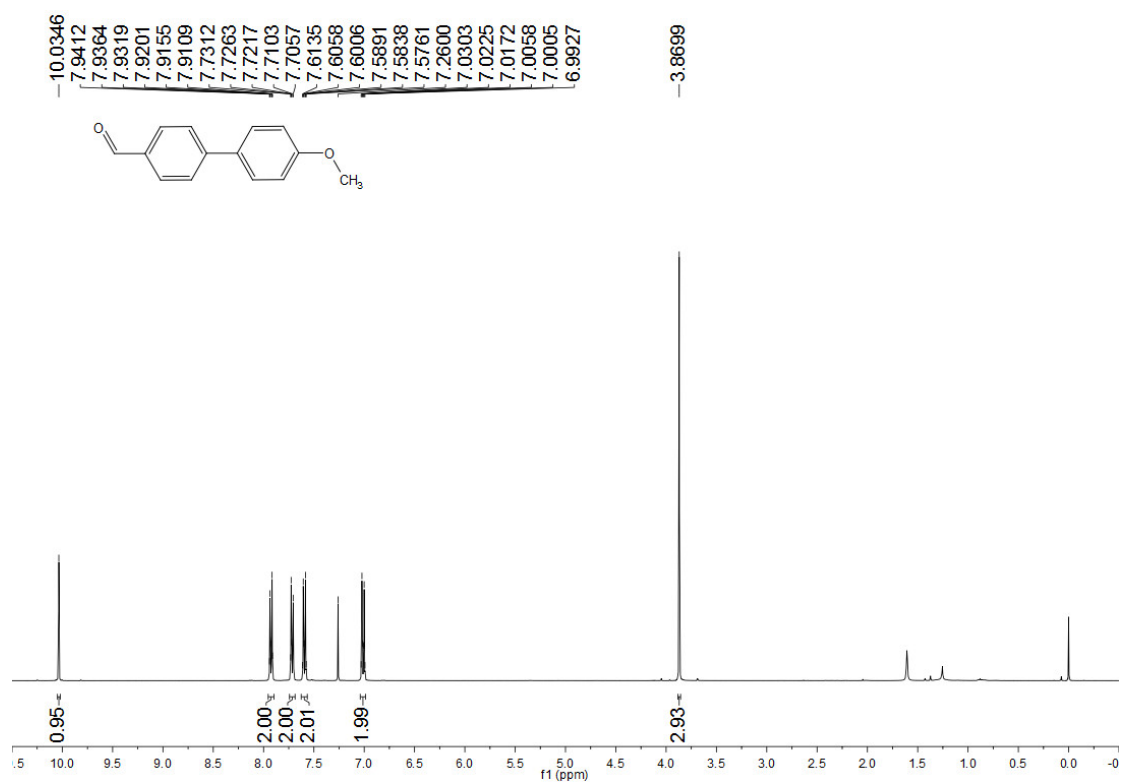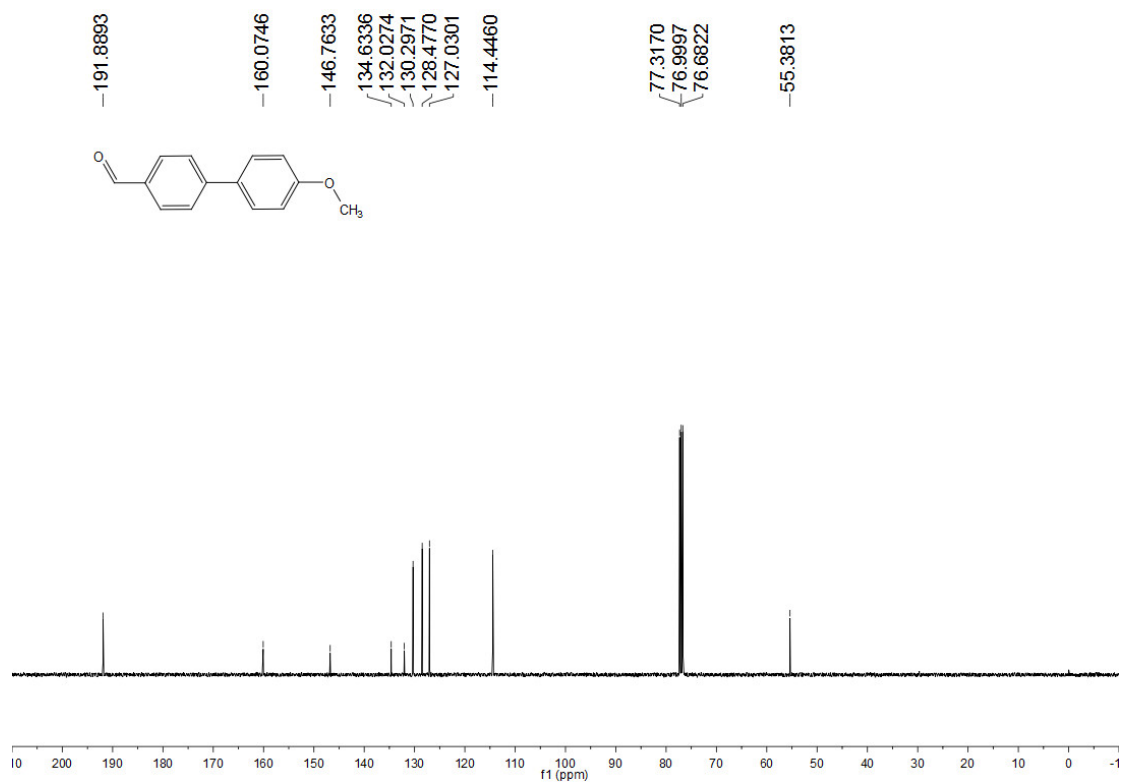

Figure S11. <sup>1</sup>H NMR and <sup>13</sup>C NMR spectra of **3g**.



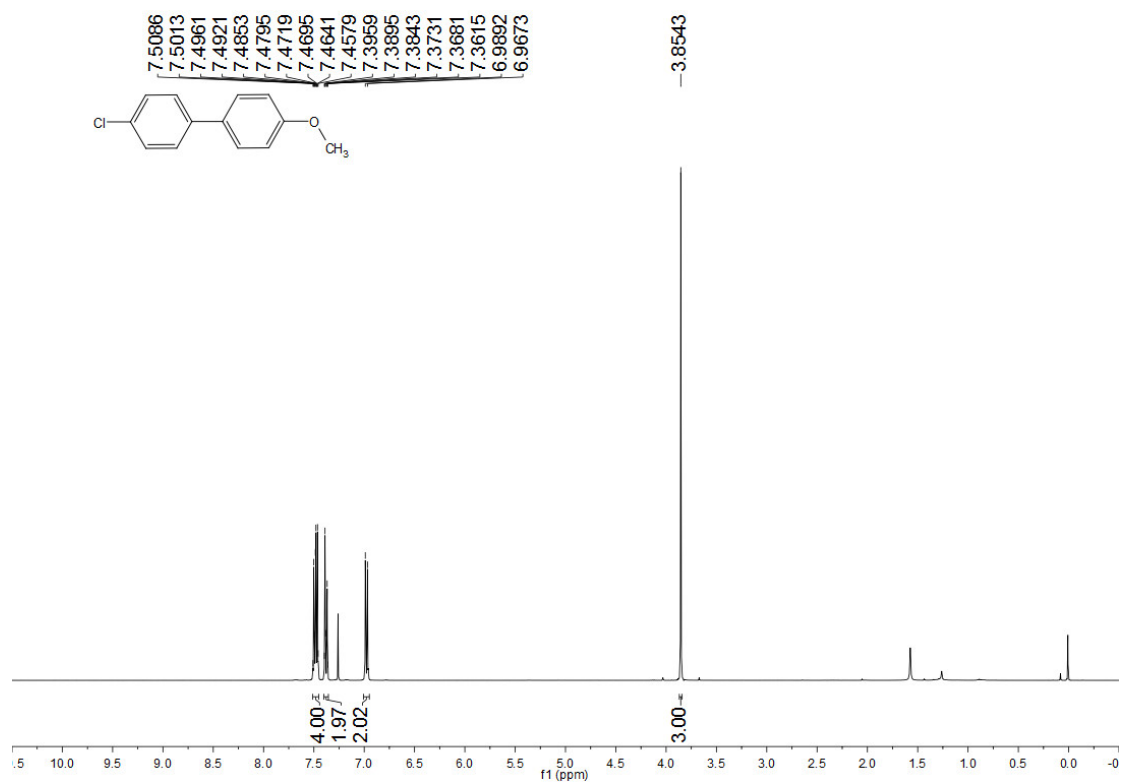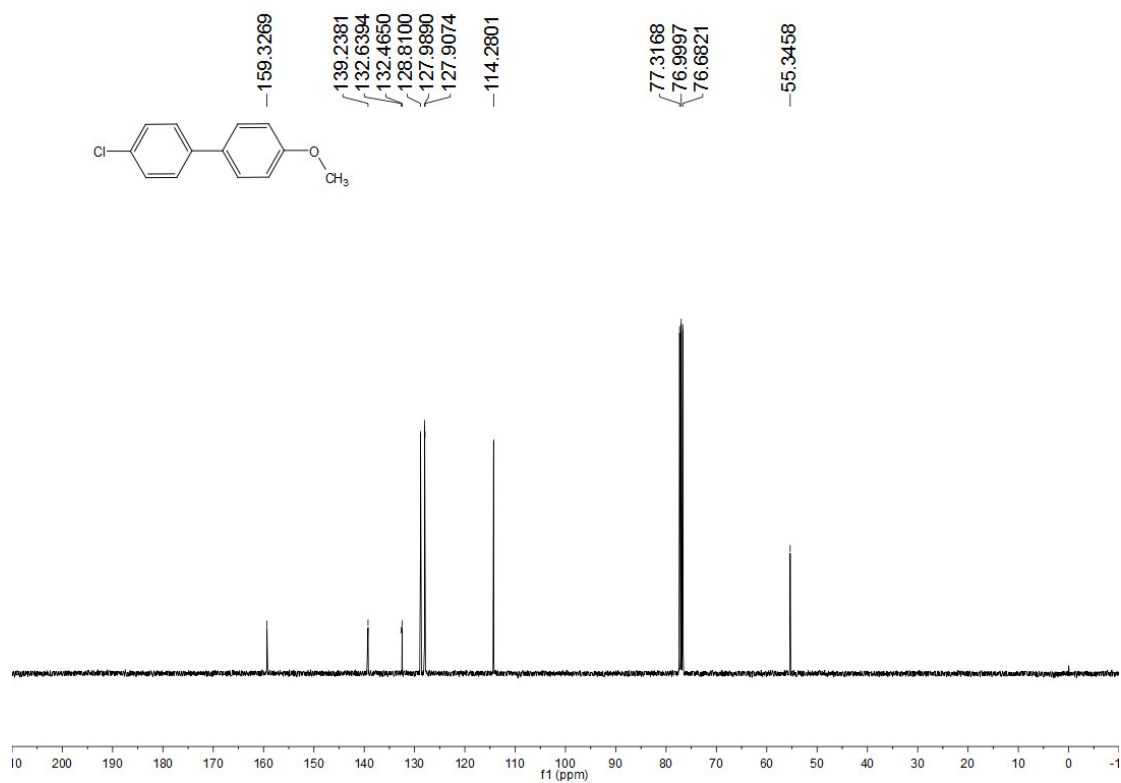

Figure S12. <sup>1</sup>H NMR and <sup>13</sup>C NMR spectra of 3h.

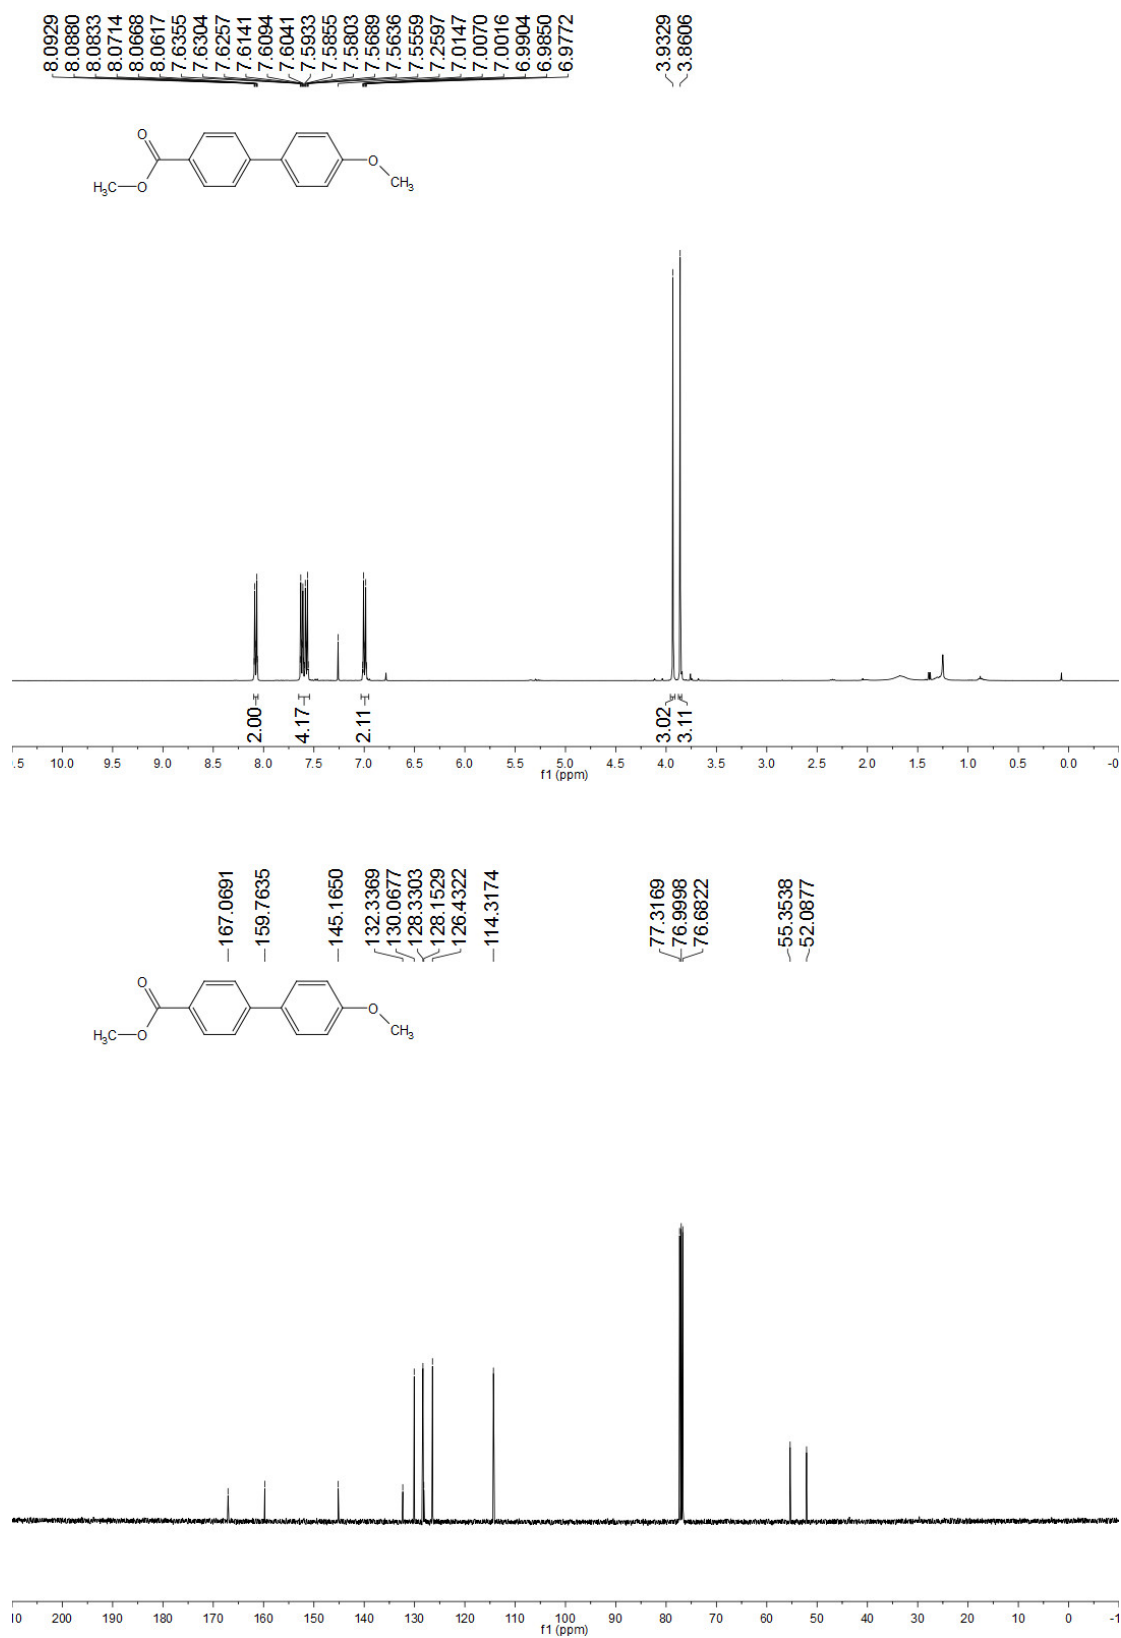

Figure S13. <sup>1</sup>H NMR and <sup>13</sup>C NMR spectra of 3i.

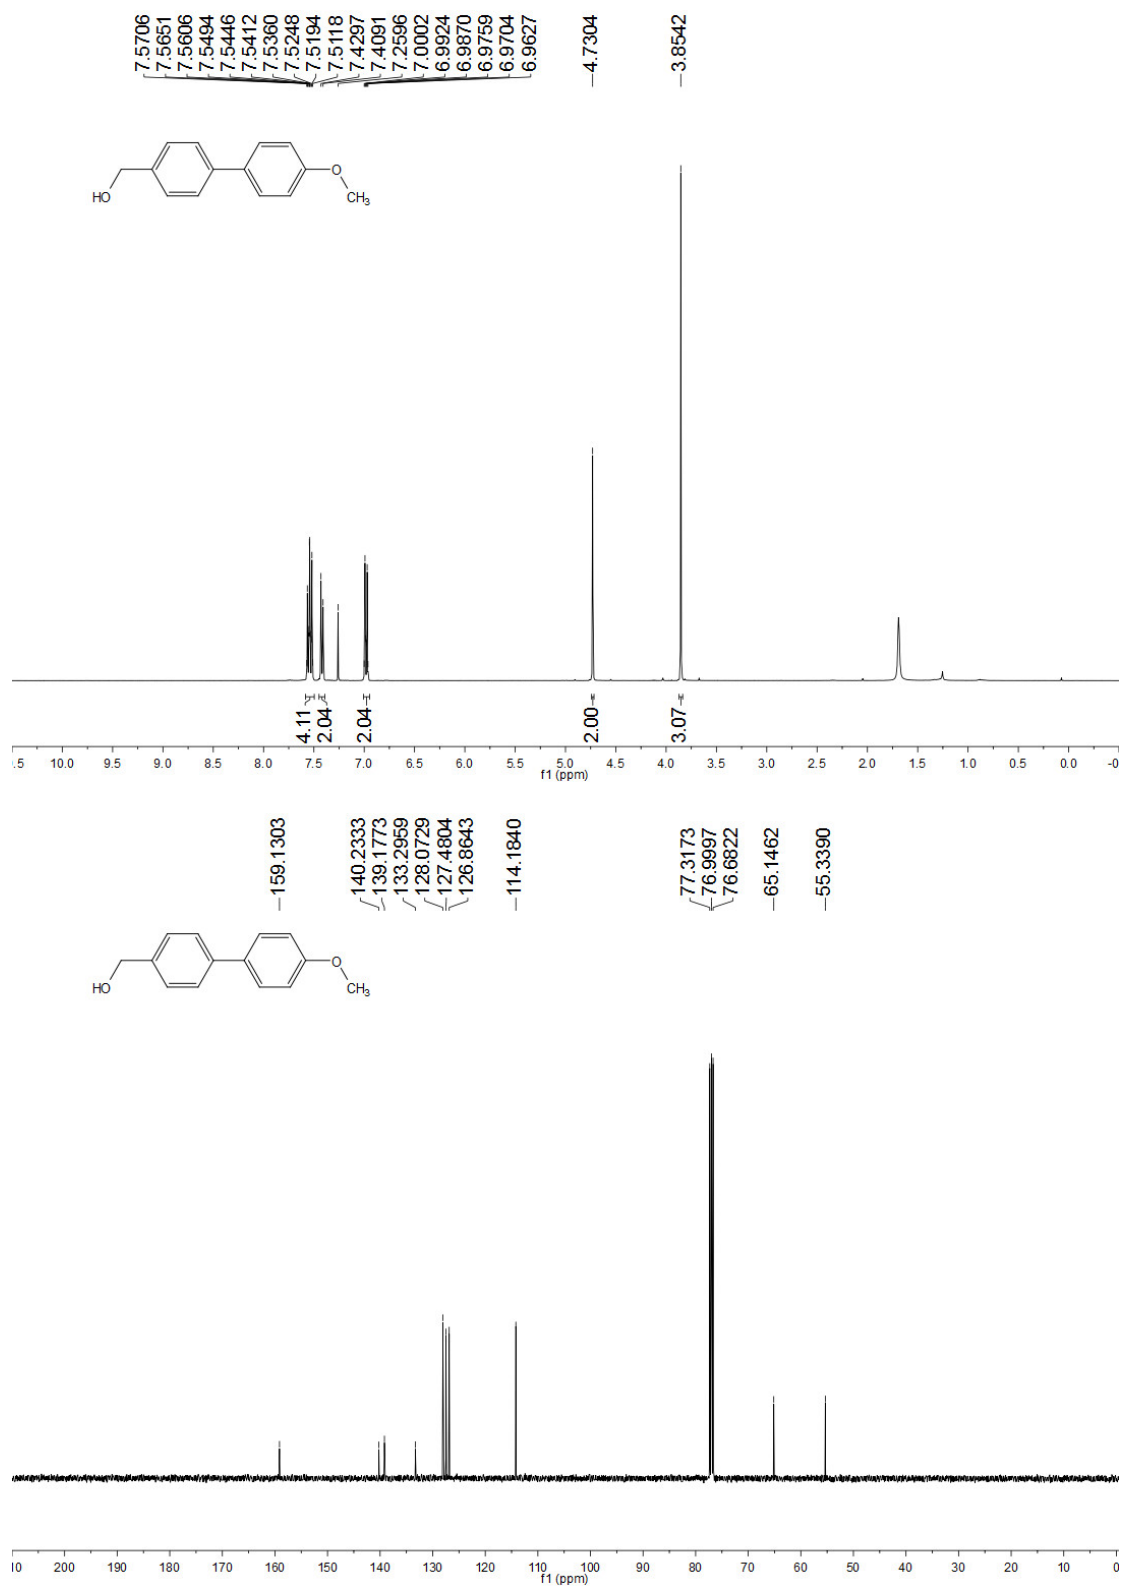

Figure S14. <sup>1</sup>H NMR and <sup>13</sup>C NMR spectra of 3j.

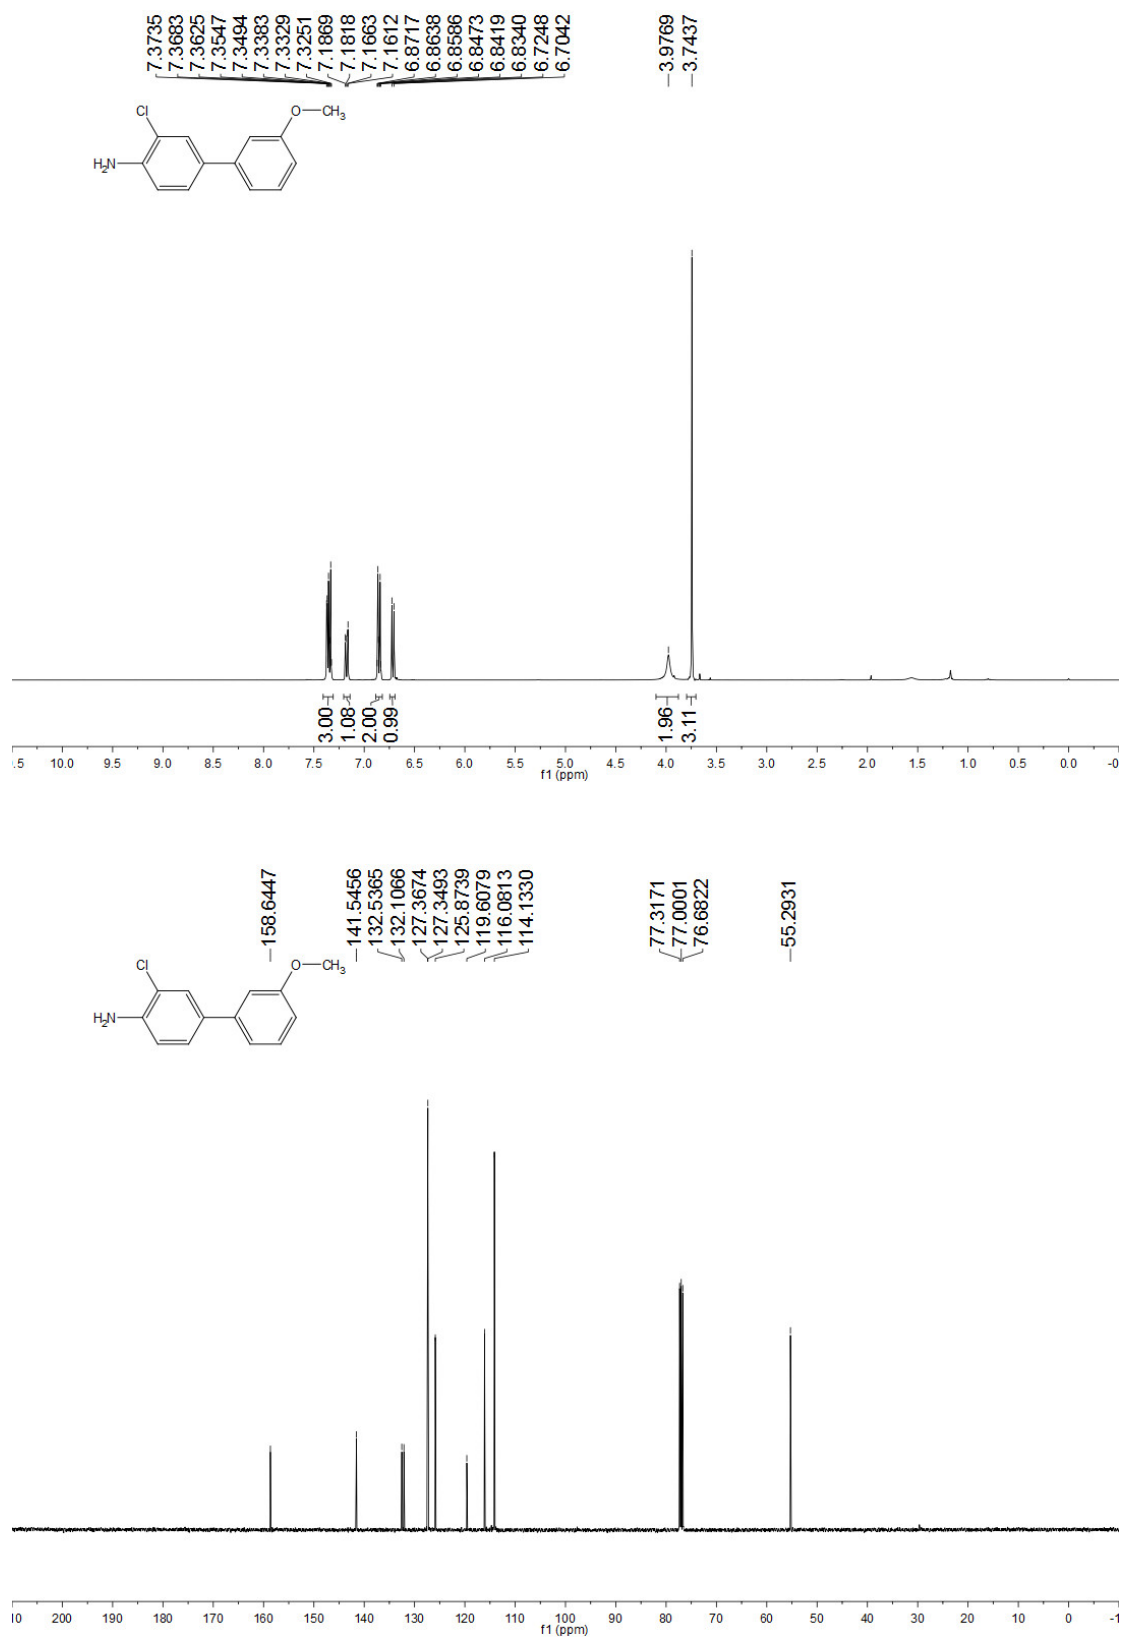

Figure S15. <sup>1</sup>H NMR and <sup>13</sup>C NMR spectra of 3k.

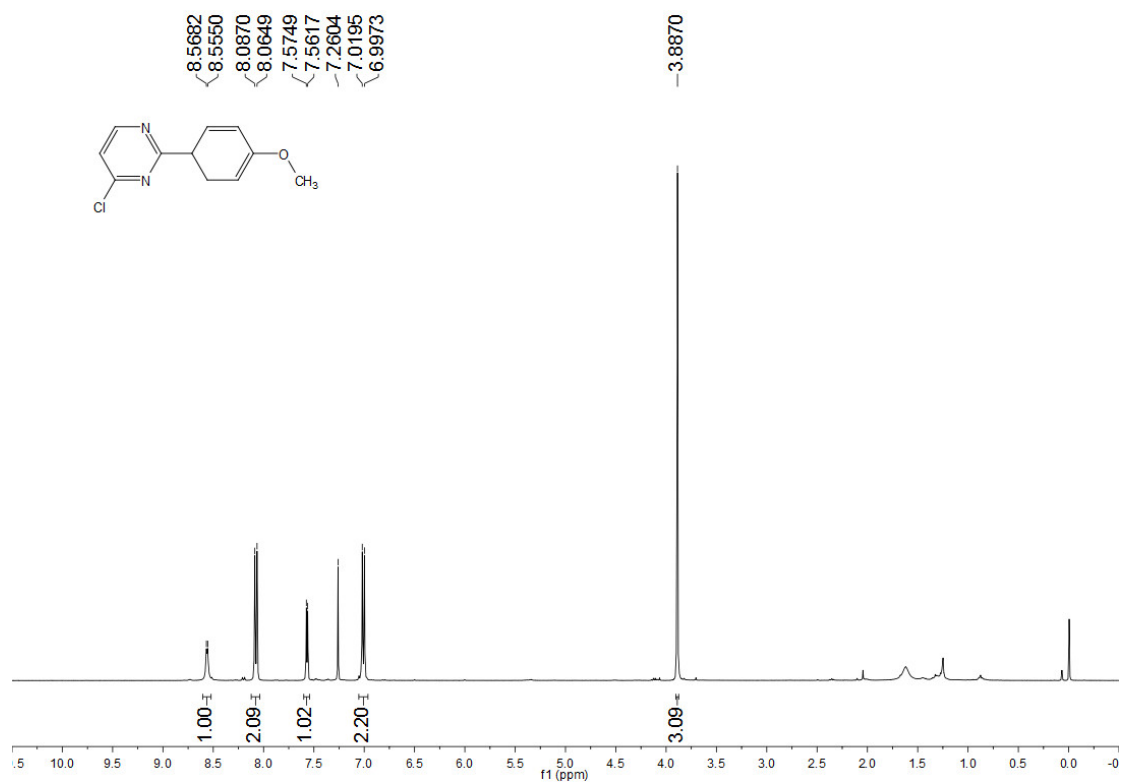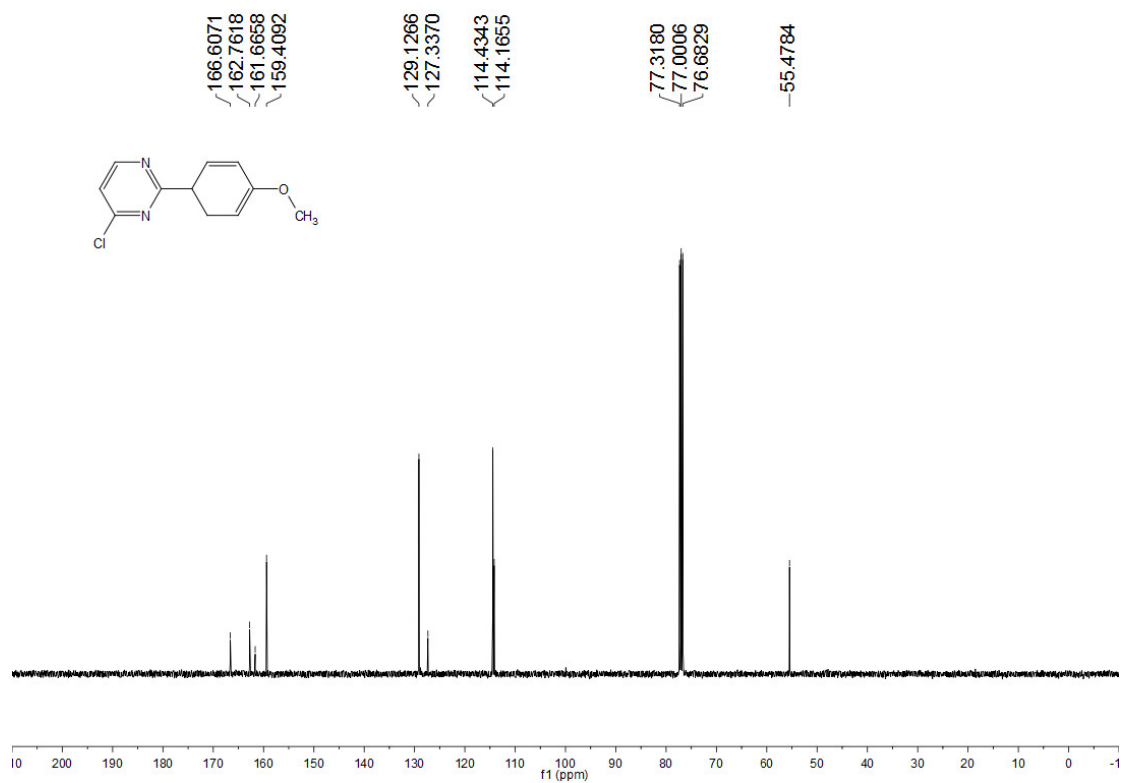

Figure S16. <sup>1</sup>H NMR and <sup>13</sup>C NMR spectra of 3l.

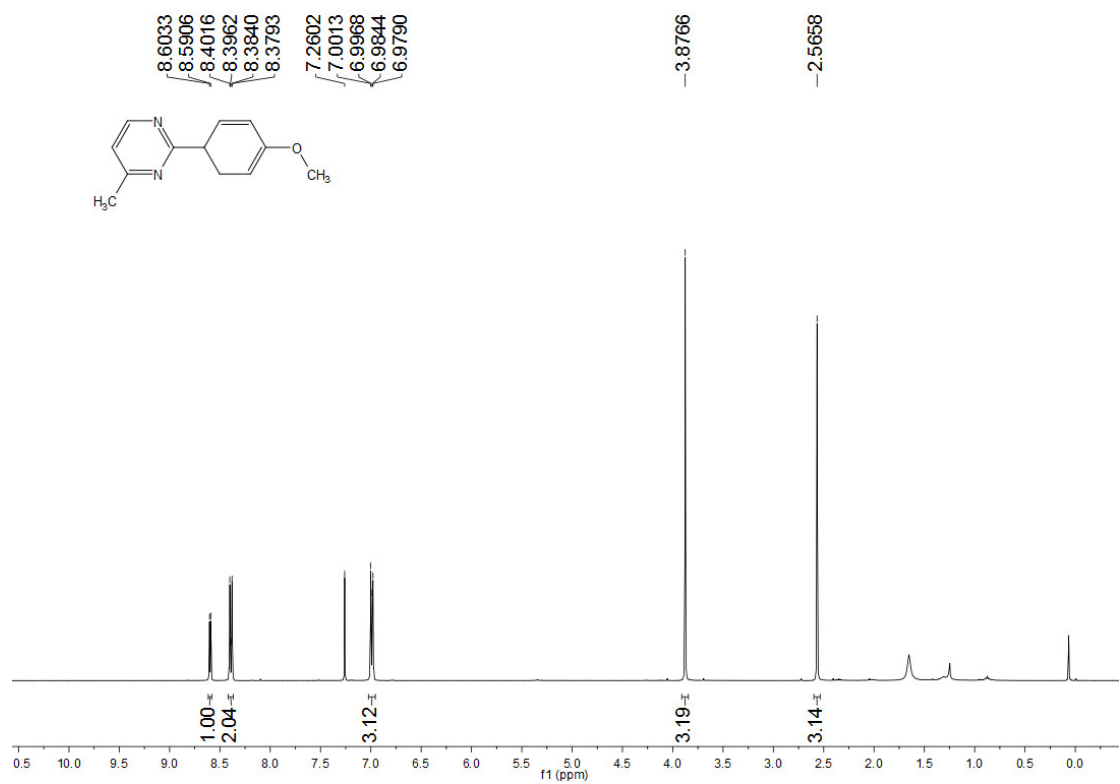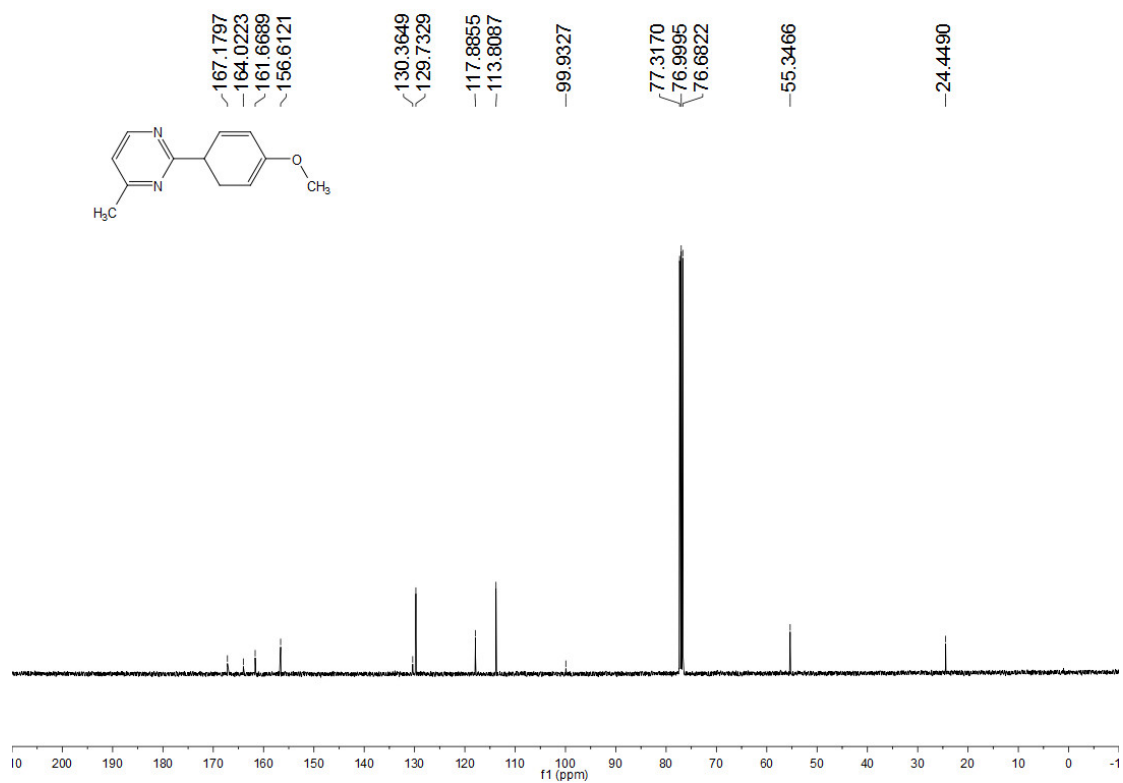

Figure S17. <sup>1</sup>H NMR and <sup>13</sup>C NMR spectra of 3m.

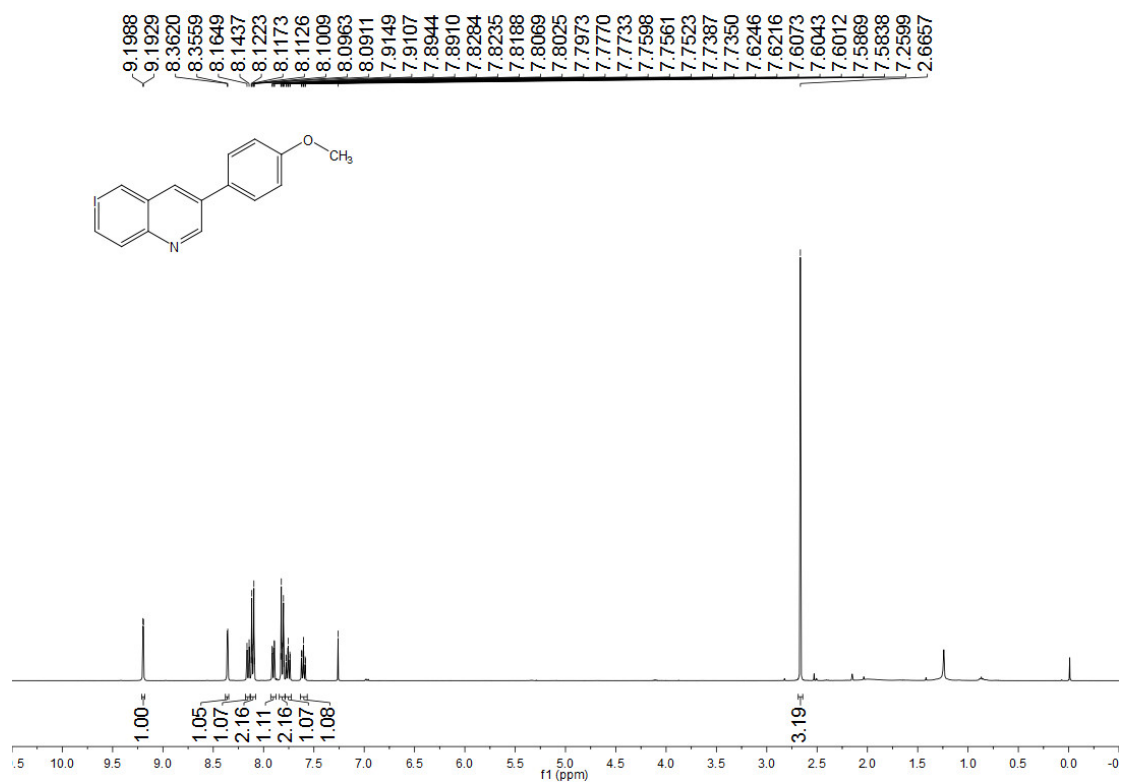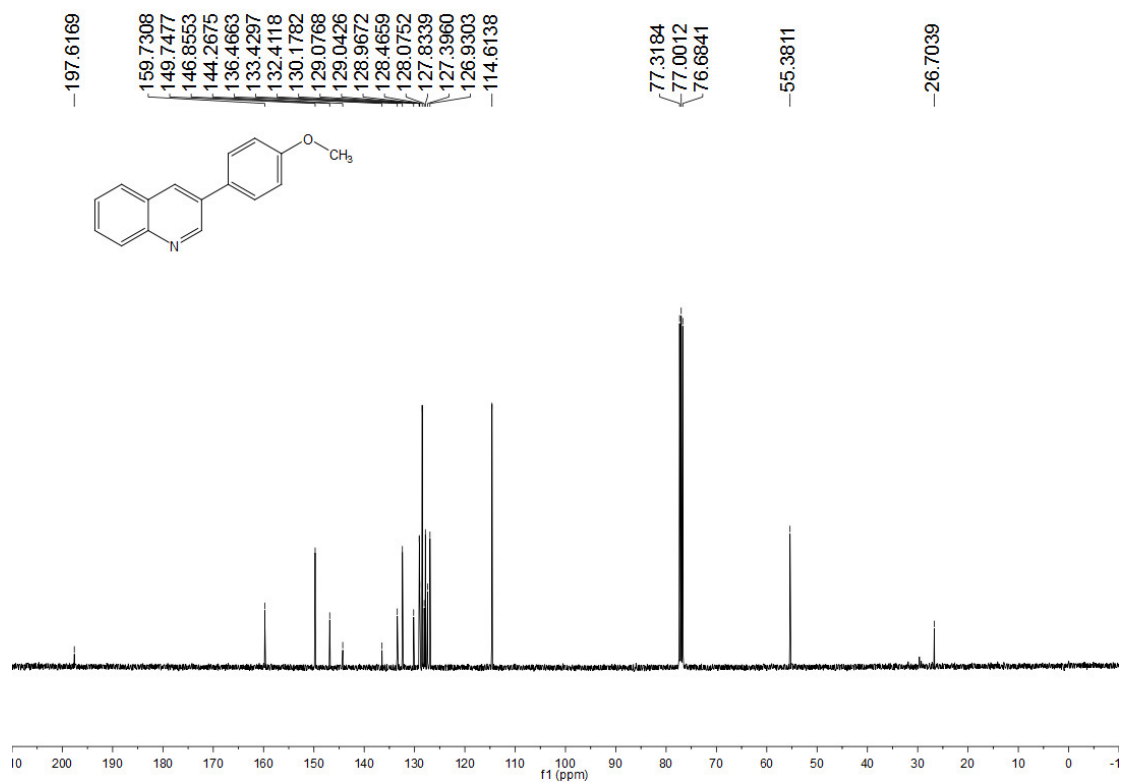

Figure S18. <sup>1</sup>H NMR and <sup>13</sup>C NMR spectra of **3n**.

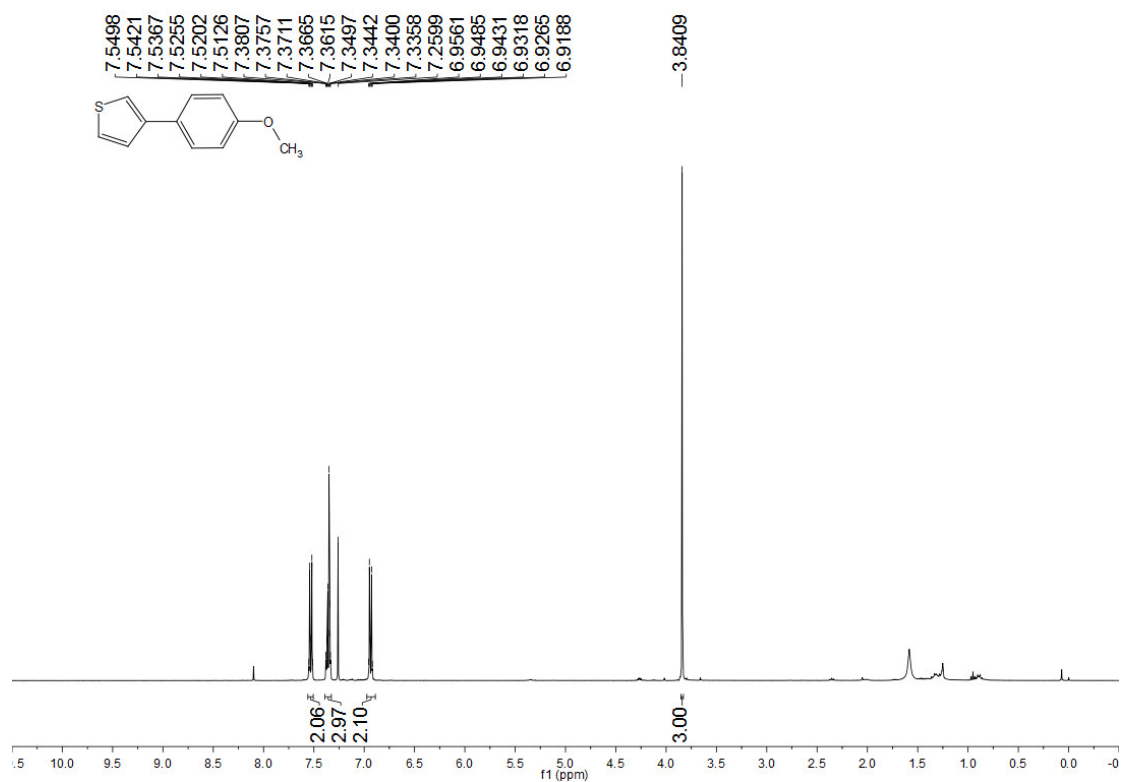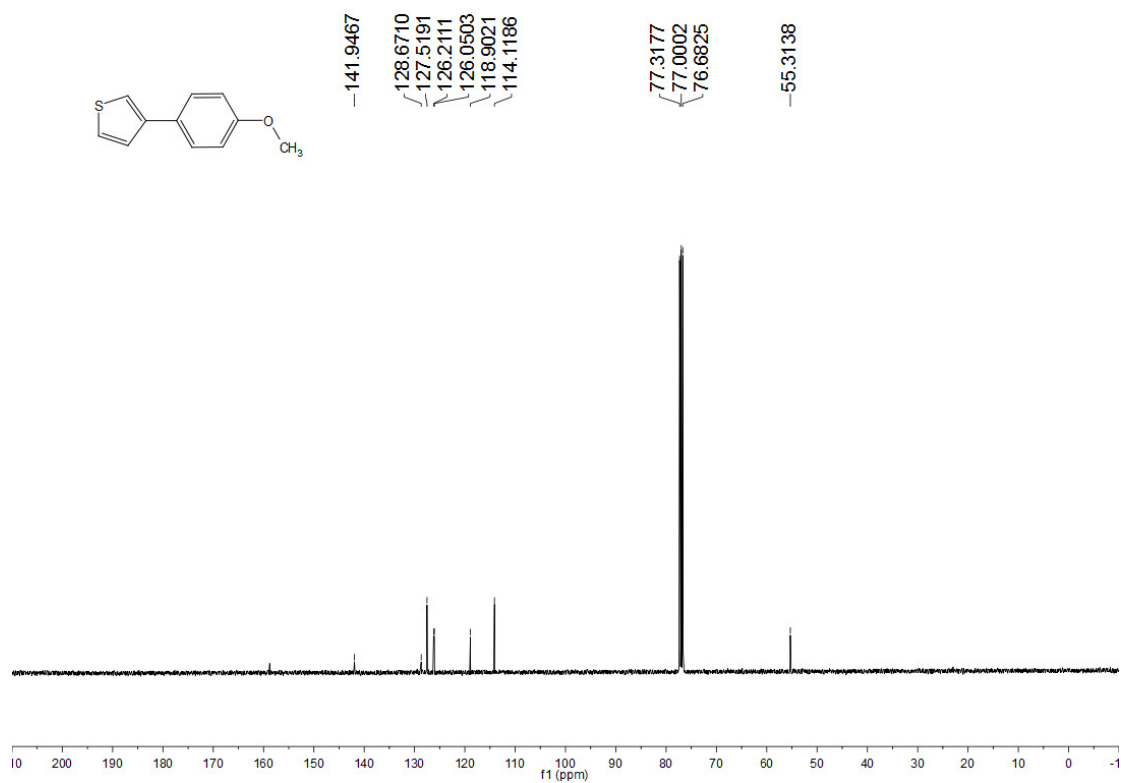

Figure S19. <sup>1</sup>H NMR and <sup>13</sup>C NMR spectra of 3o.



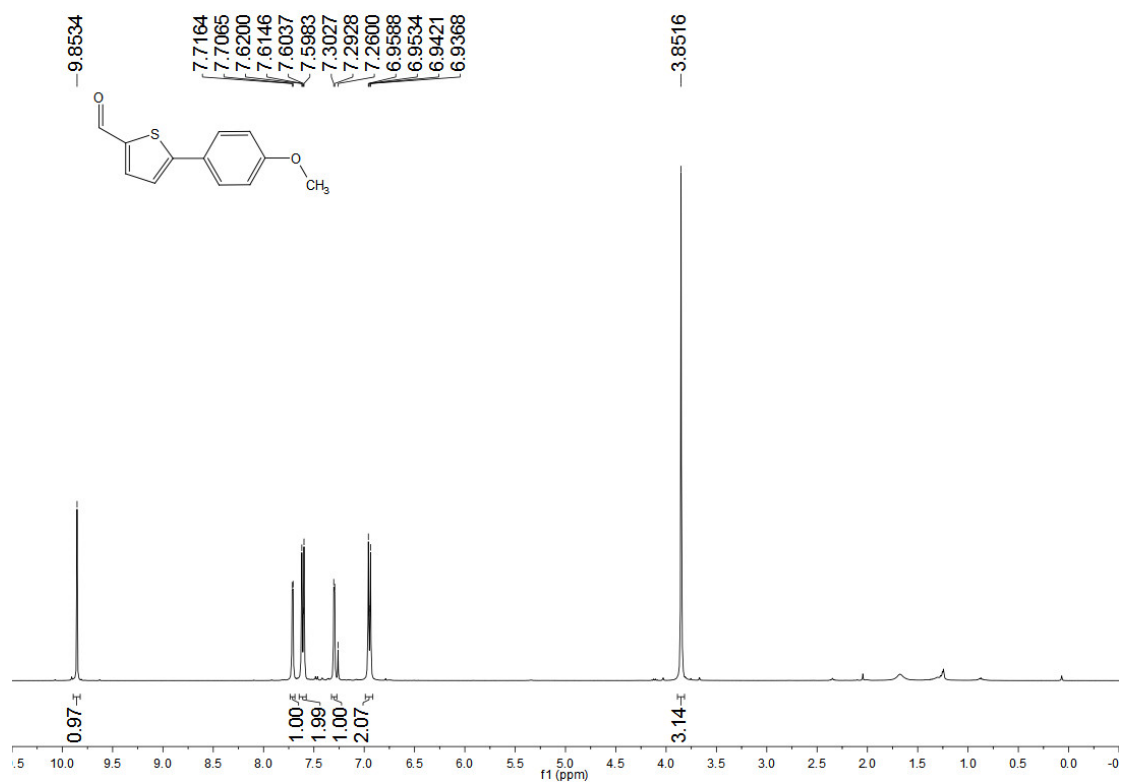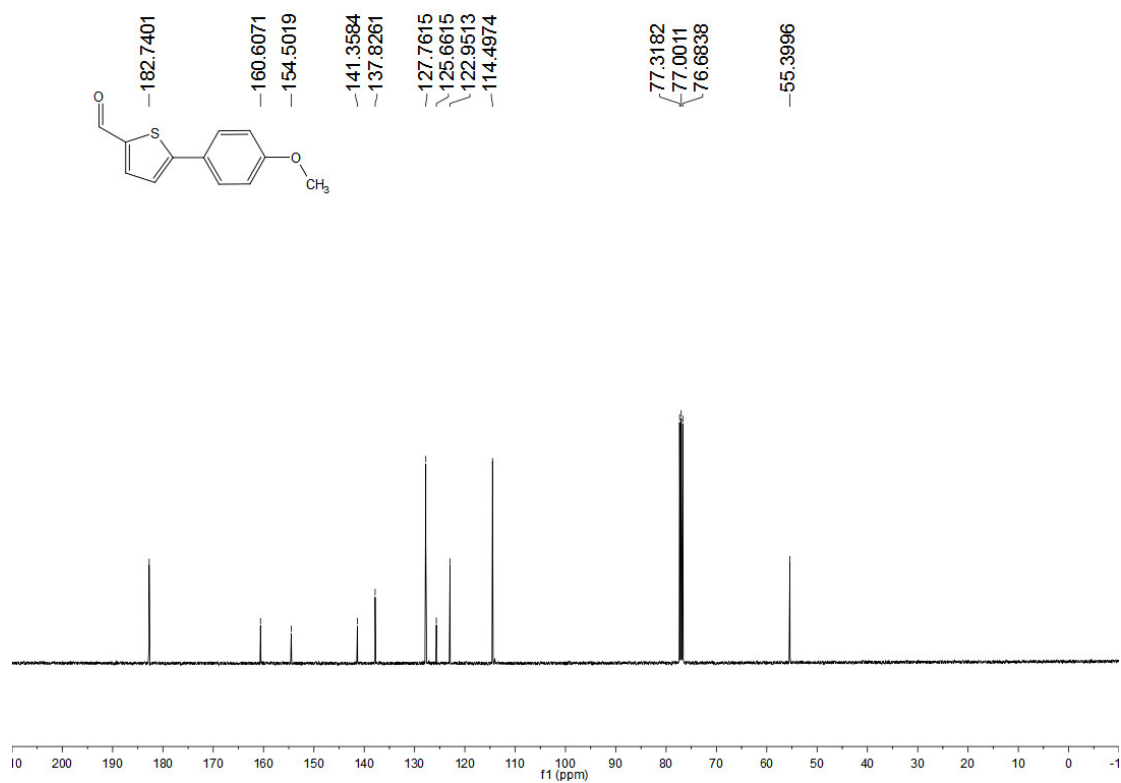

Figure S20. <sup>1</sup>H NMR and <sup>13</sup>C NMR spectra of 3p.

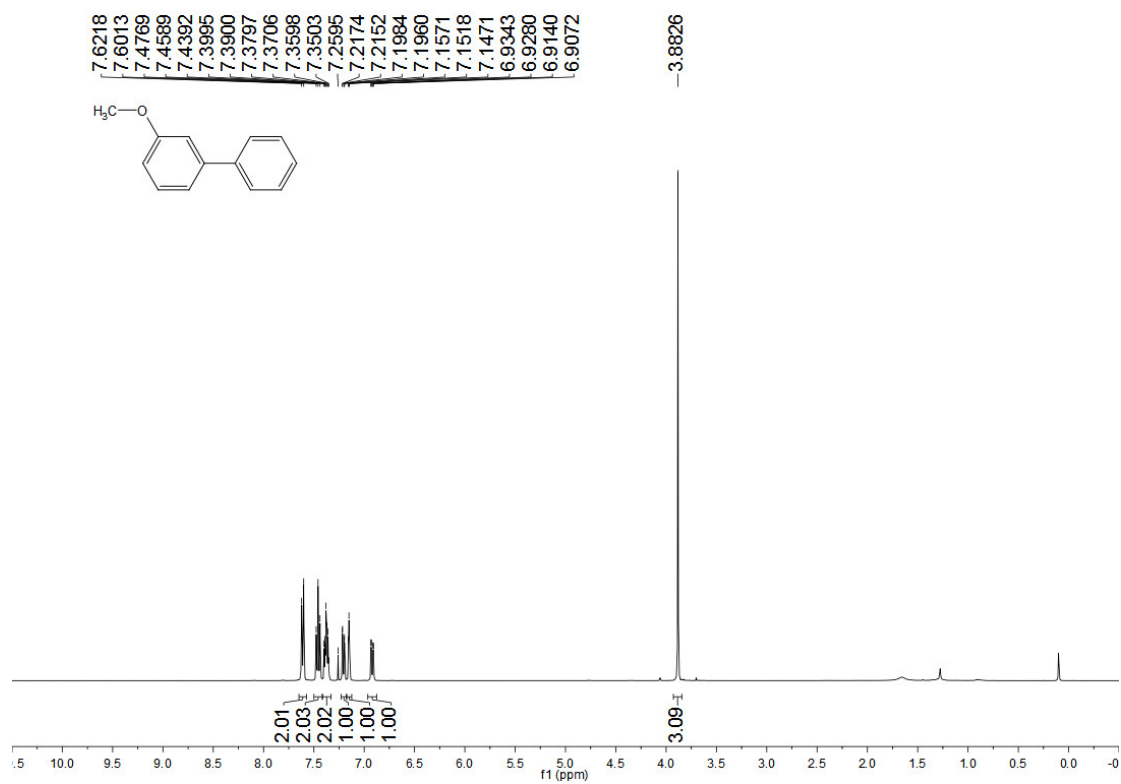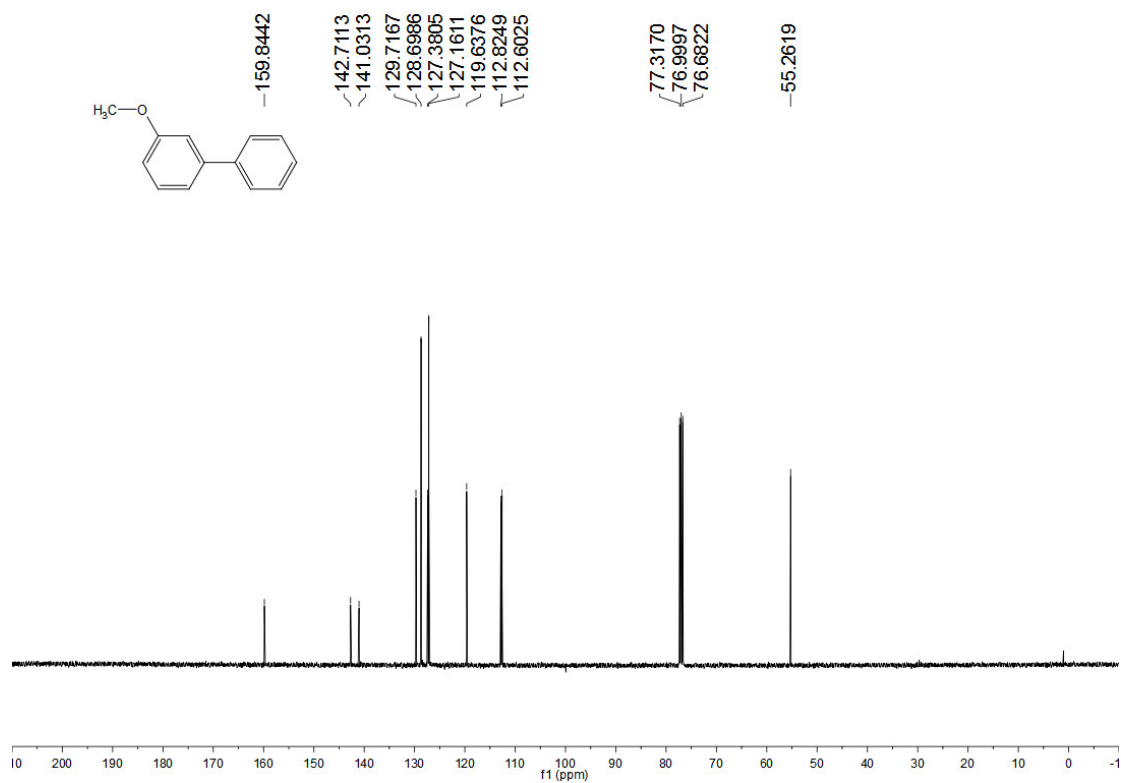

Figure S21. <sup>1</sup>H NMR and <sup>13</sup>C NMR spectra of **3q**.

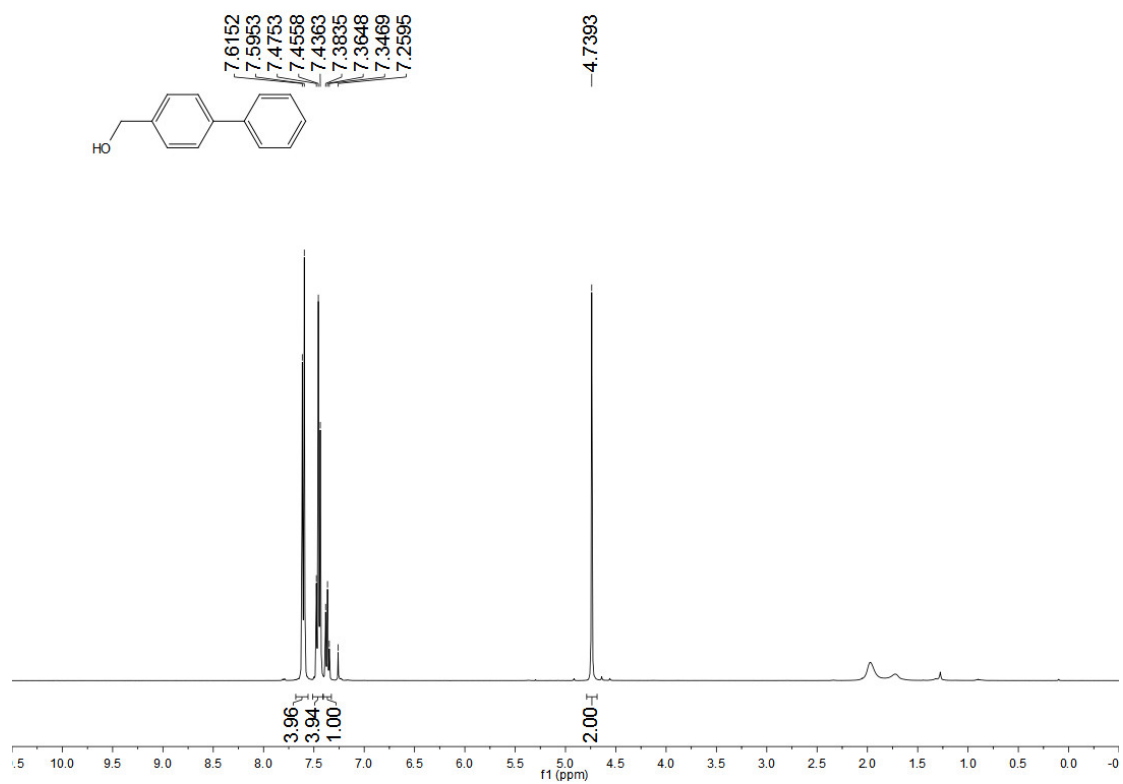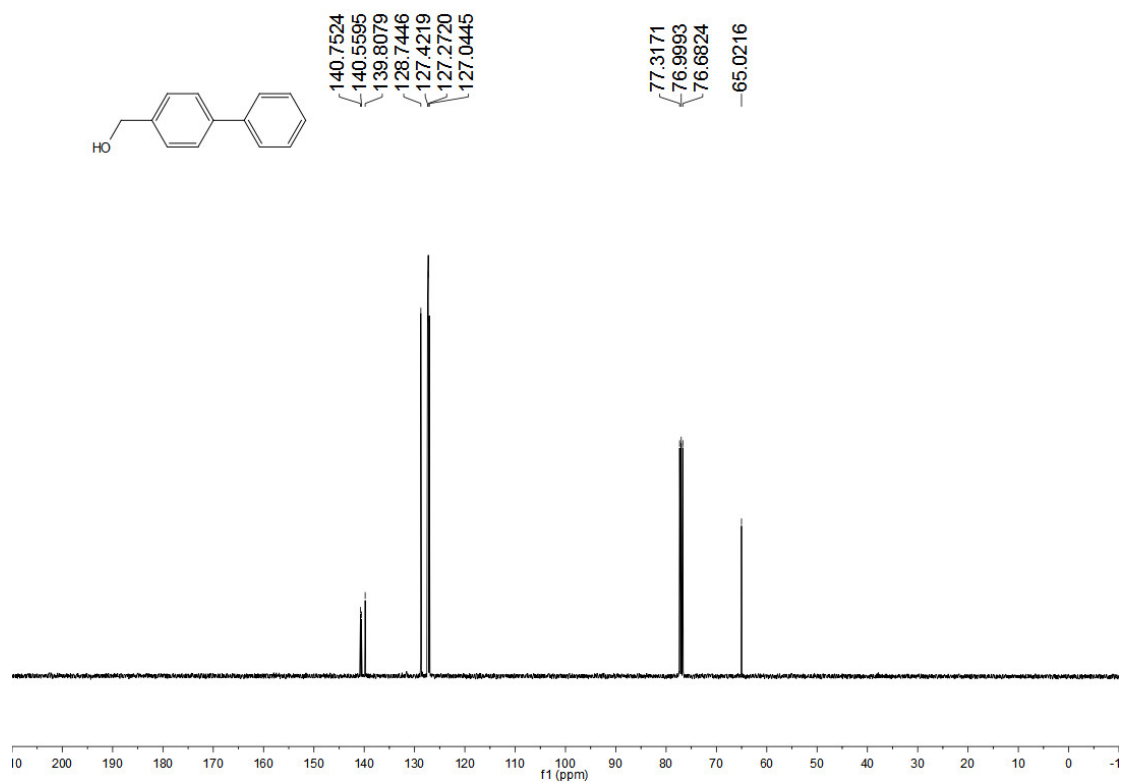

Figure S22. <sup>1</sup>H NMR and <sup>13</sup>C NMR spectra of 3r.

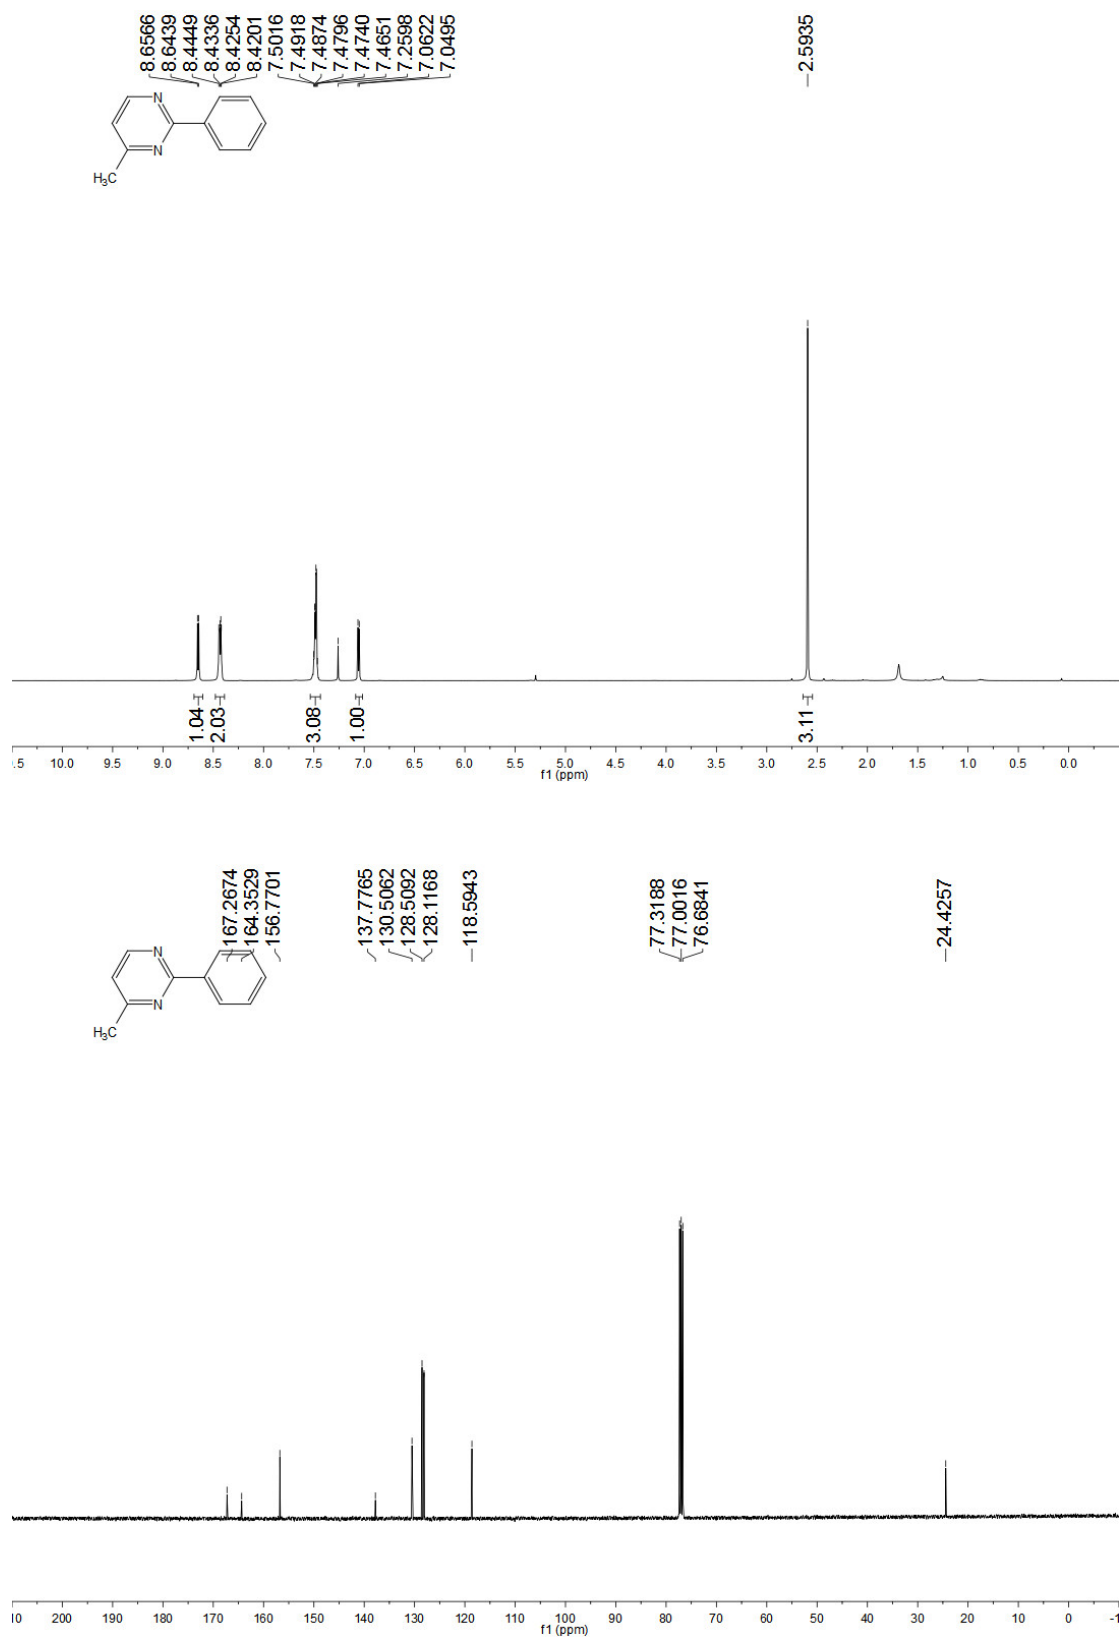

Figure S23. <sup>1</sup>H NMR and <sup>13</sup>C NMR spectra of 3s.

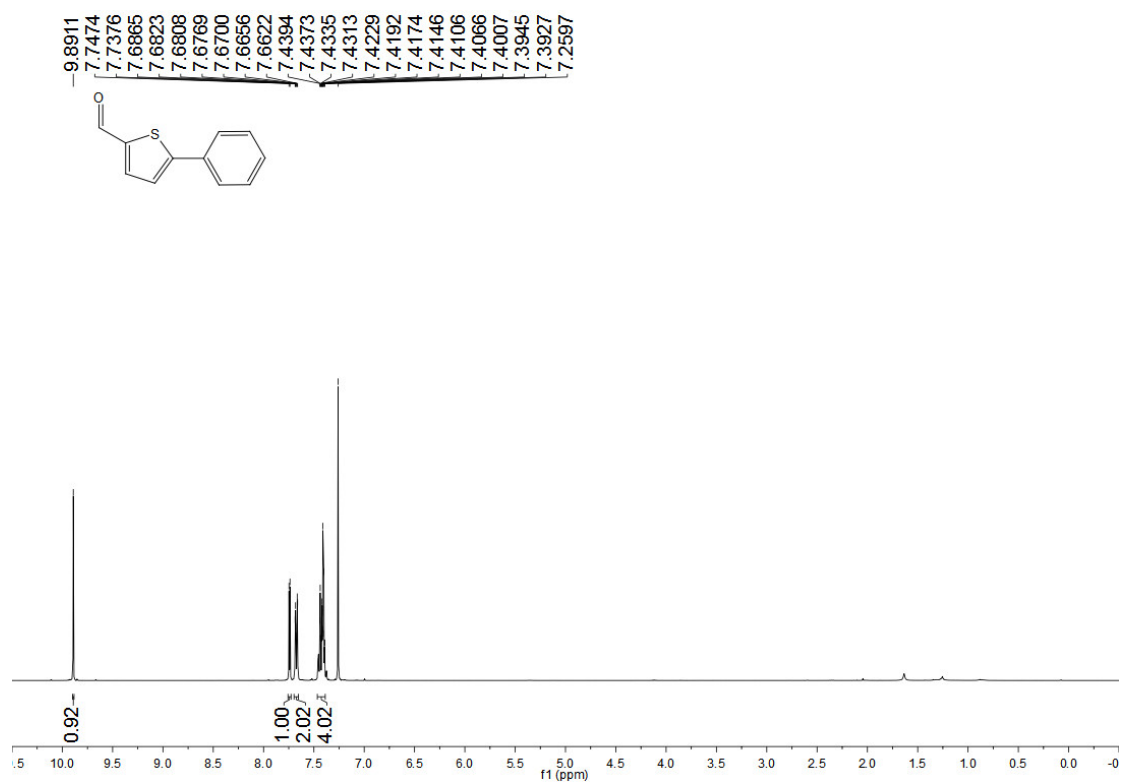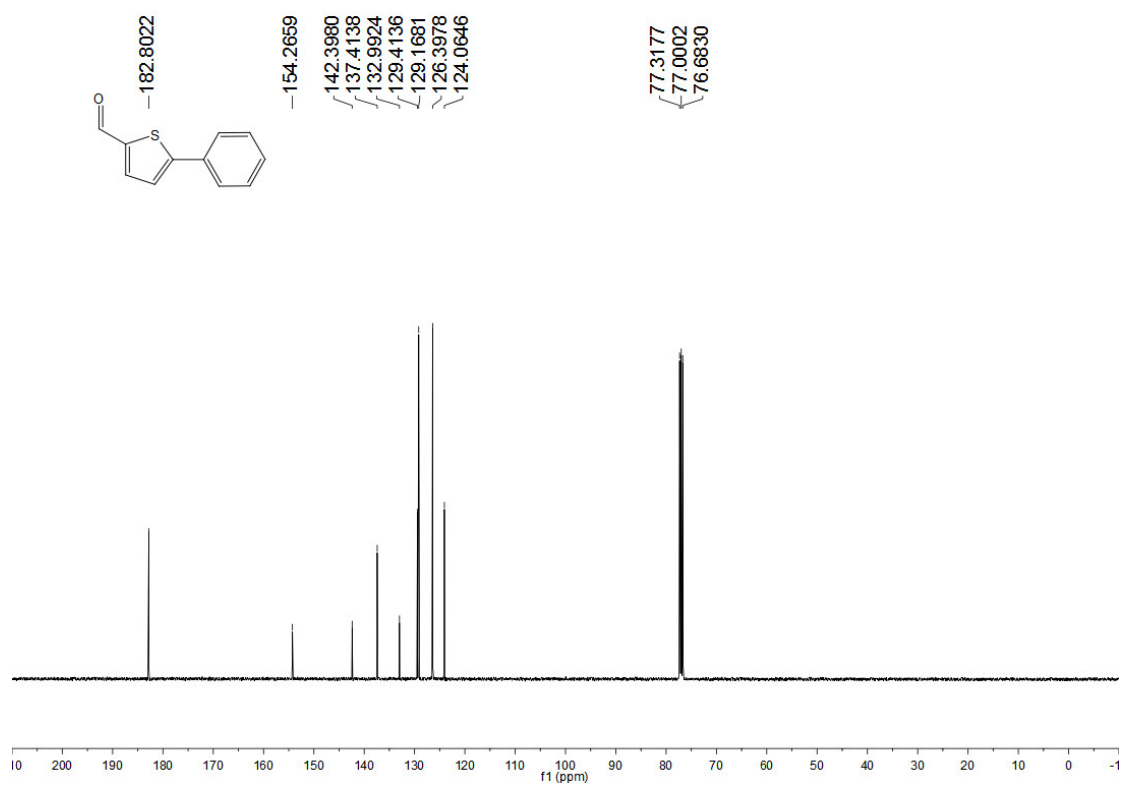

Figure S24. <sup>1</sup>H NMR and <sup>13</sup>C NMR spectra of 3t.

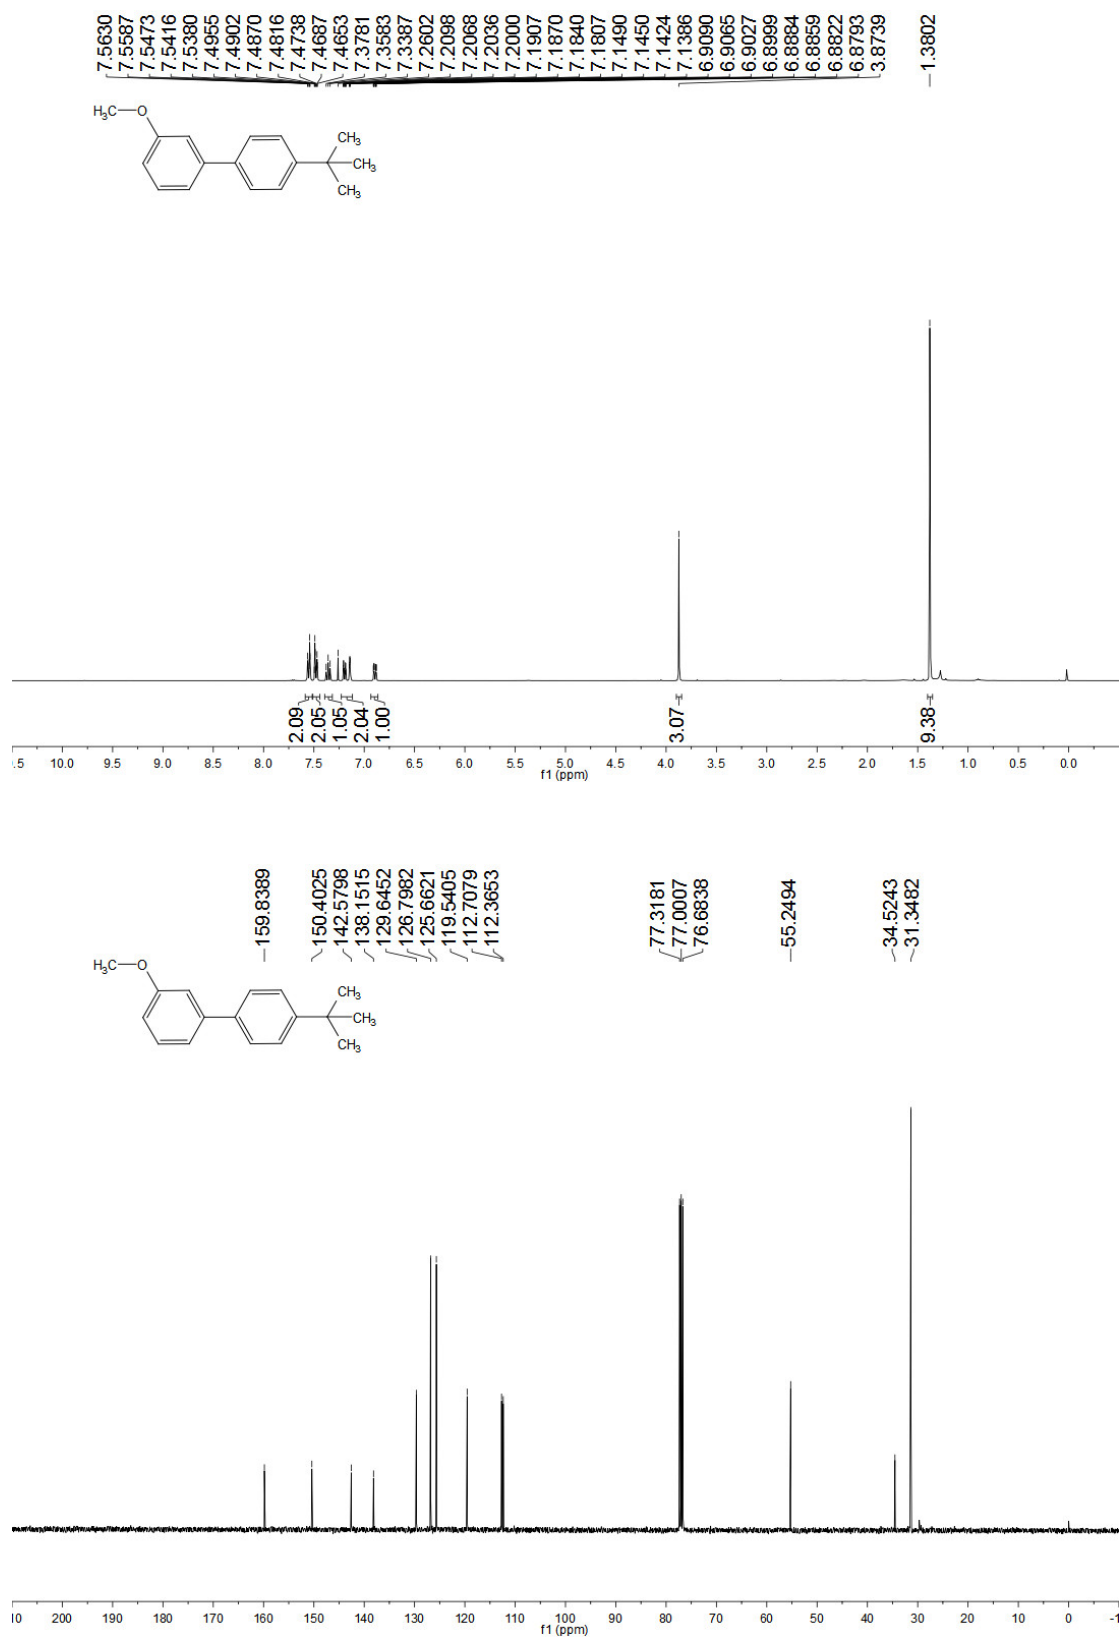

Figure S25. <sup>1</sup>H NMR and <sup>13</sup>C NMR spectra of 3u.

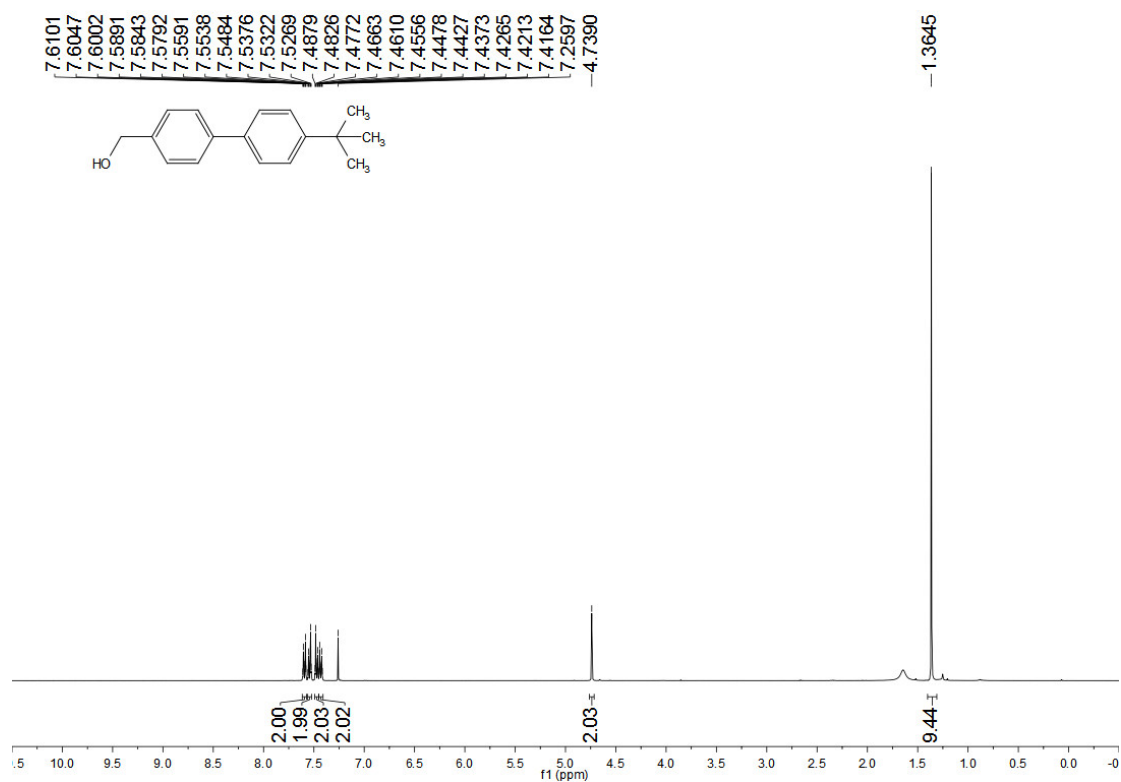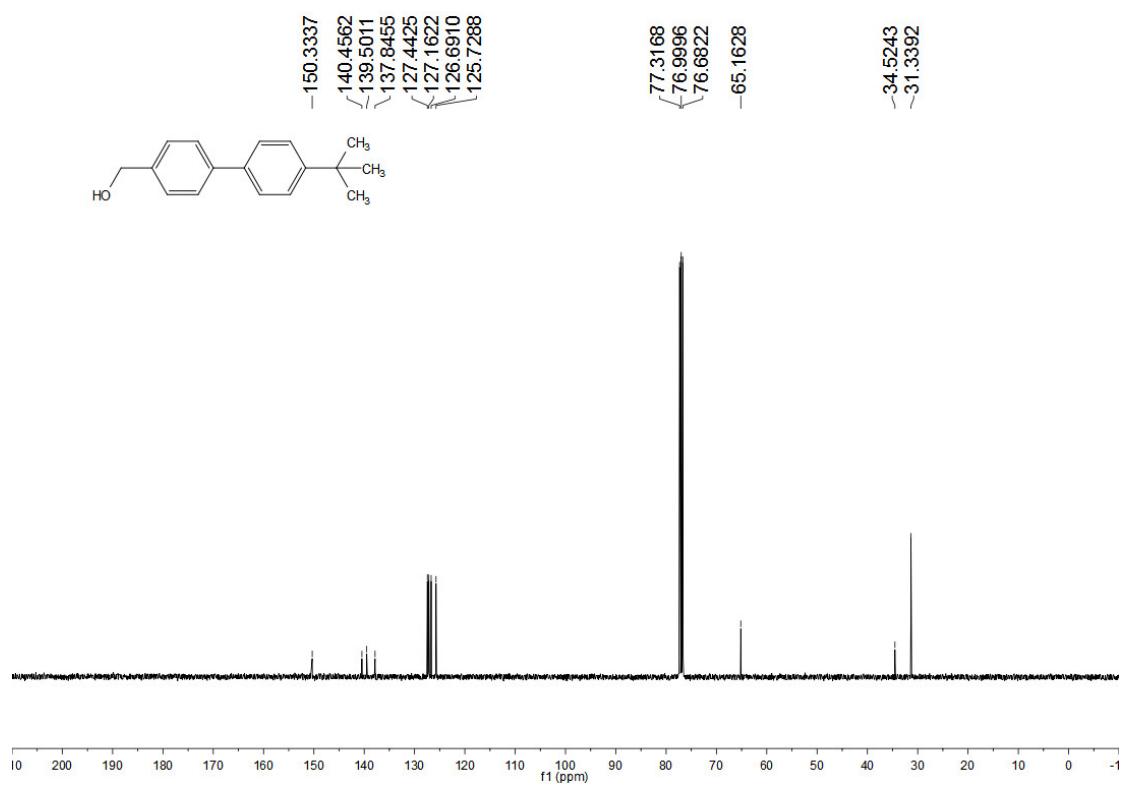

Figure S26. <sup>1</sup>H NMR and <sup>13</sup>C NMR spectra of 3v.

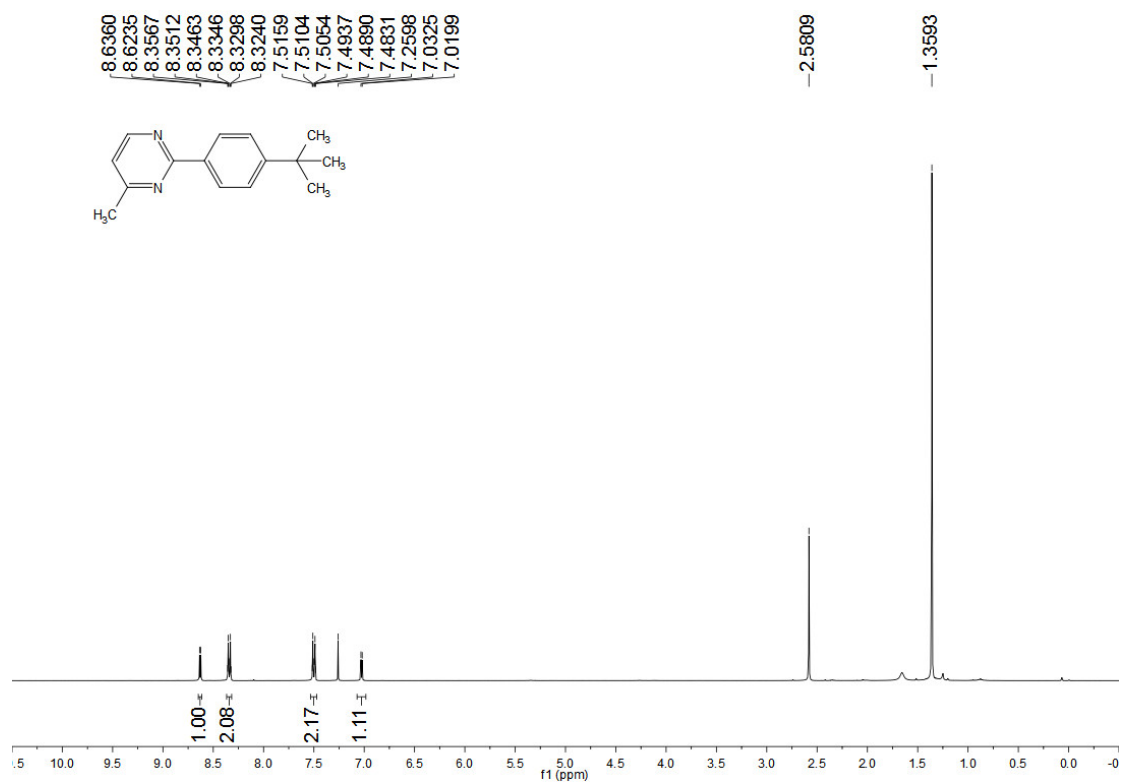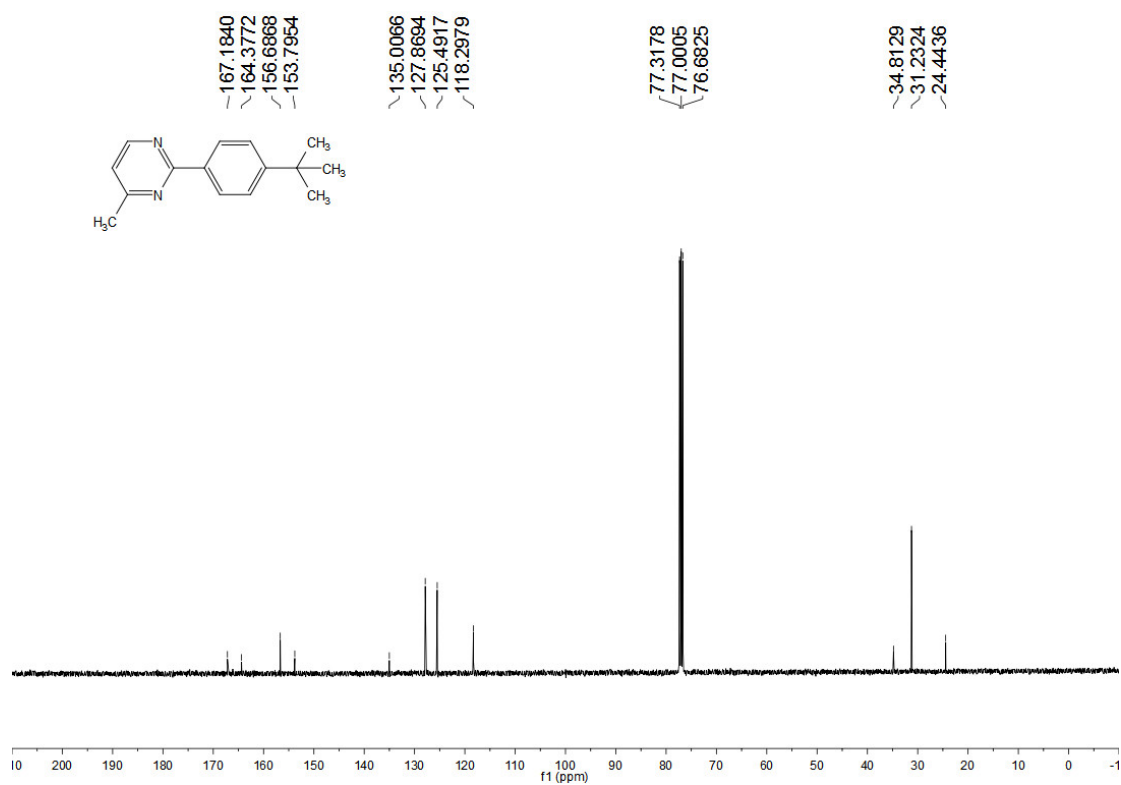

Figure S27. <sup>1</sup>H NMR and <sup>13</sup>C NMR spectra of **3w**.



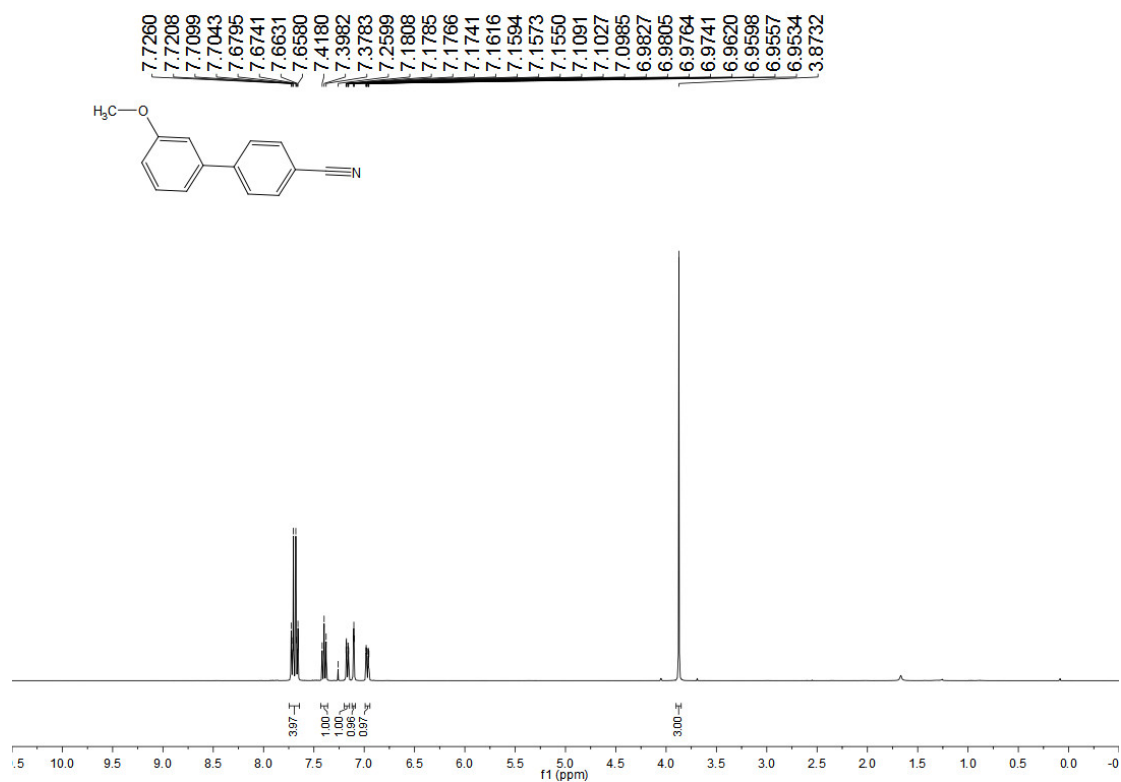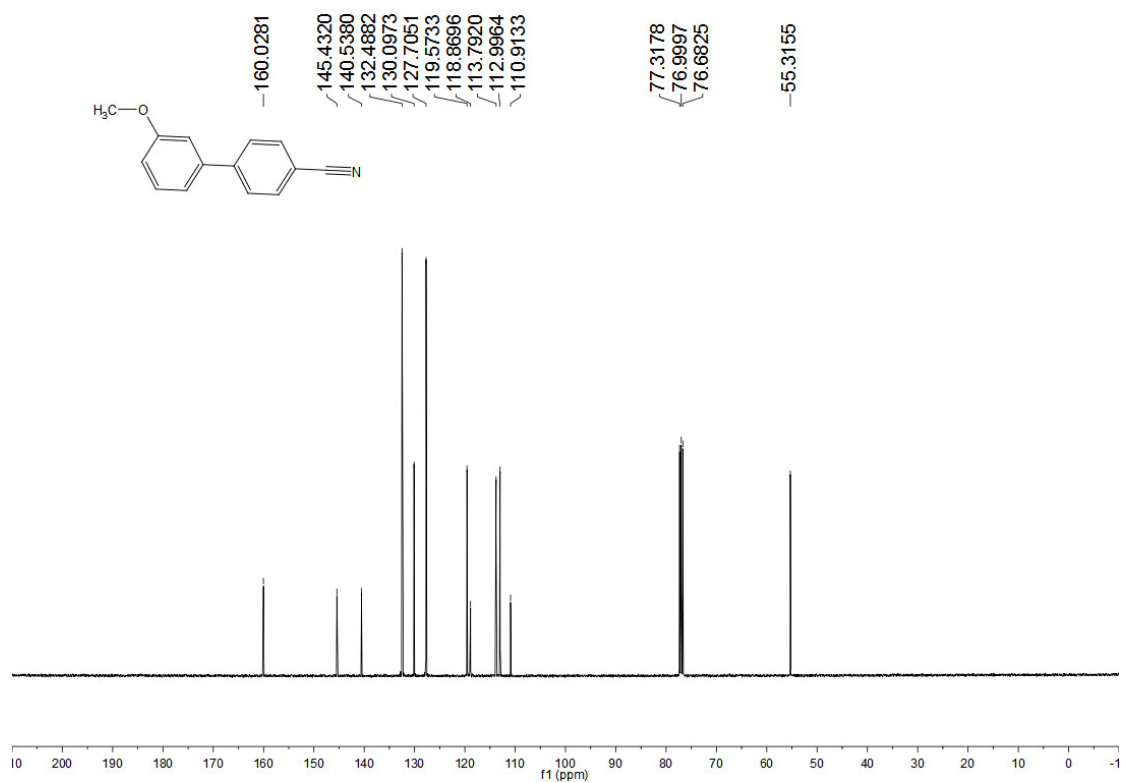

Figure S28. <sup>1</sup>H NMR and <sup>13</sup>C NMR spectra of 3x.

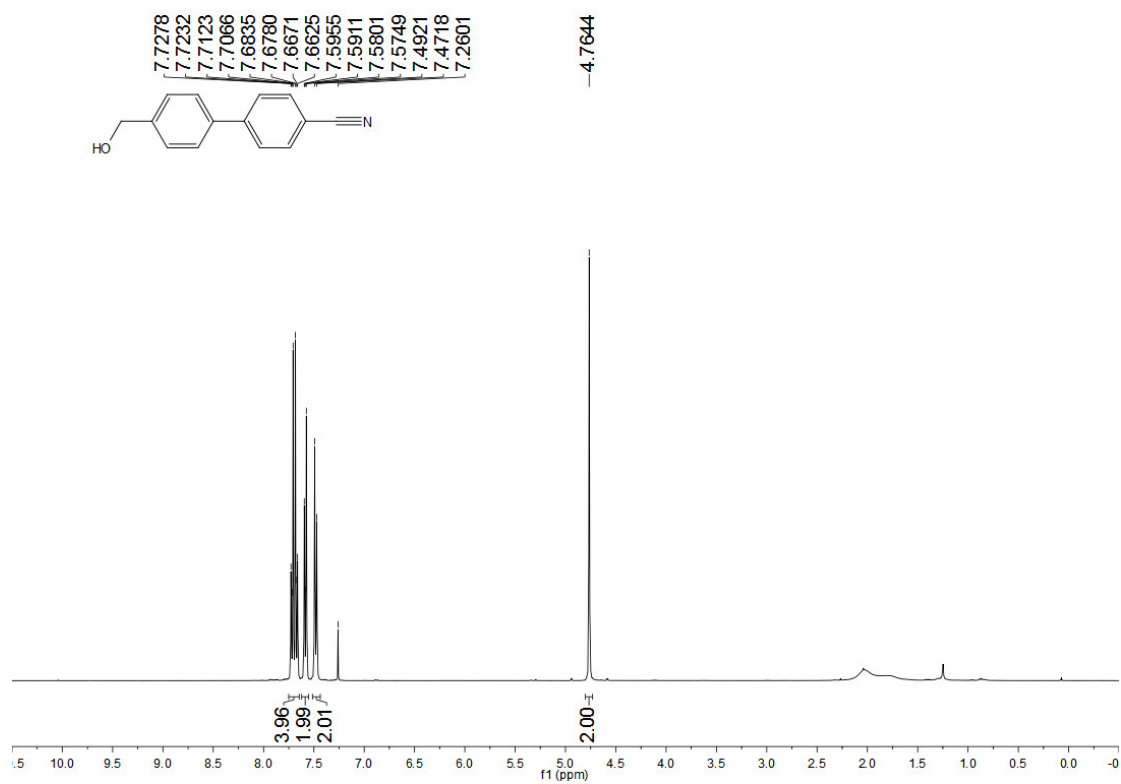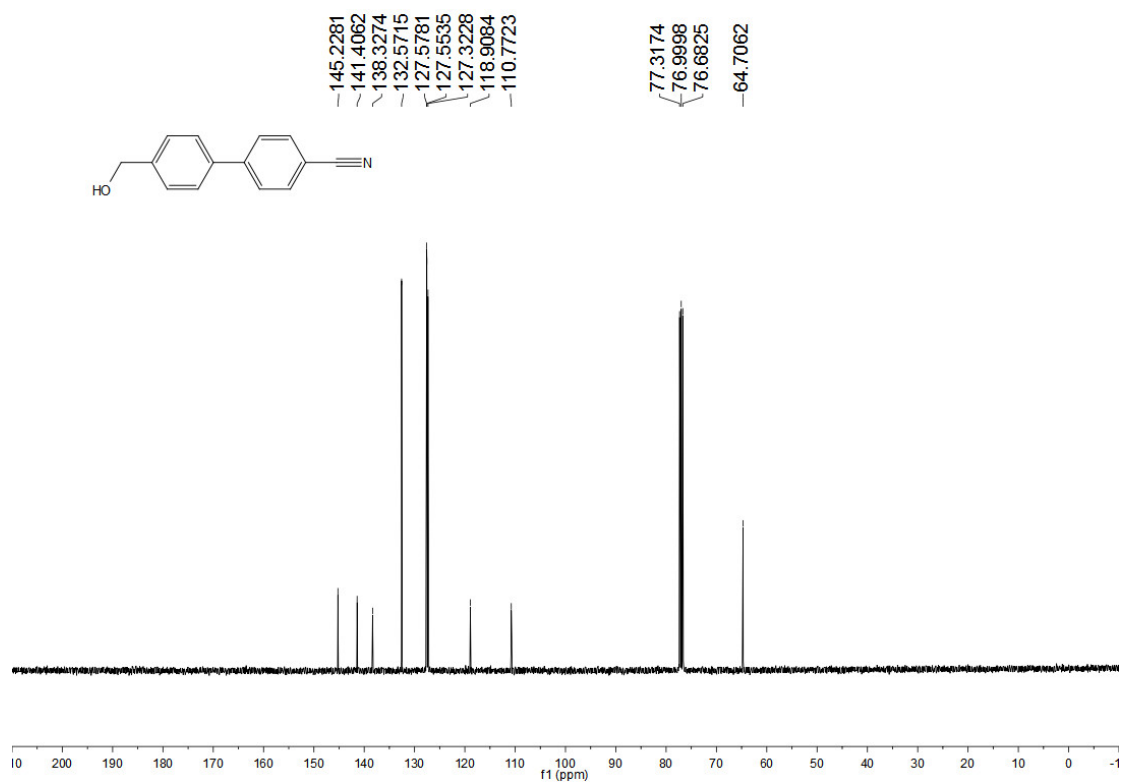

Figure S29. <sup>1</sup>H NMR and <sup>13</sup>C NMR spectra of 3y.

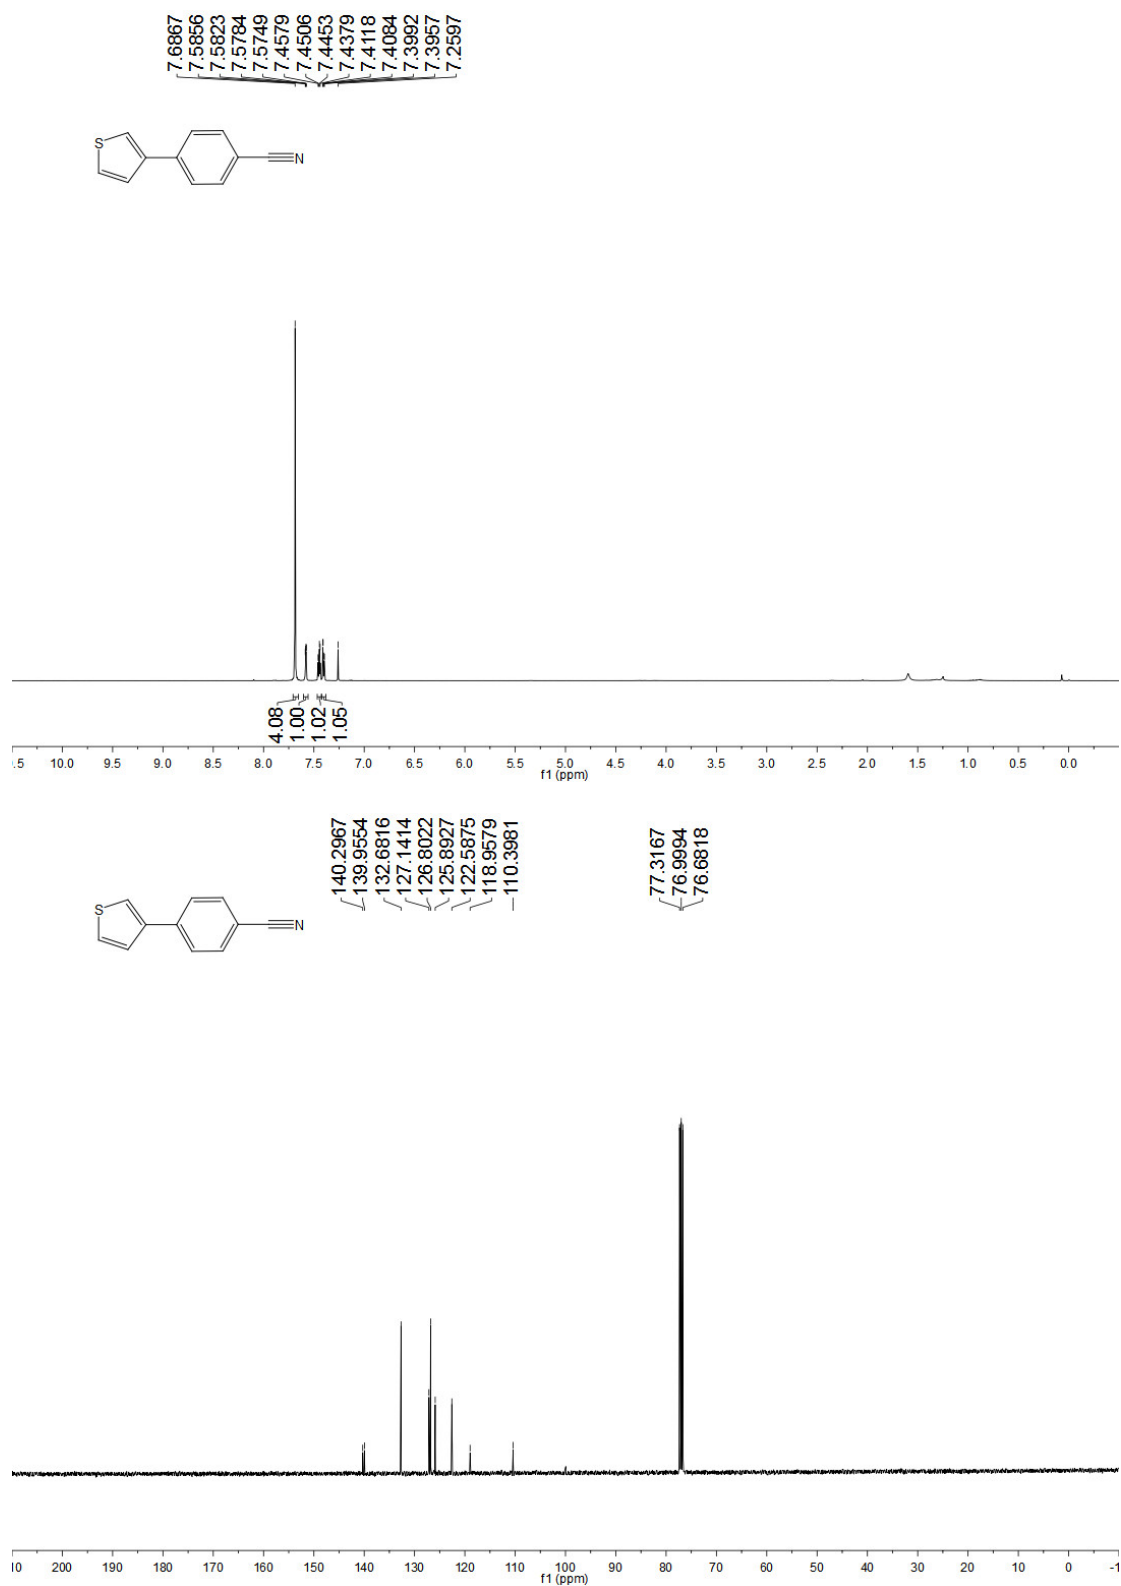

Figure S30. <sup>1</sup>H NMR and <sup>13</sup>C NMR spectra of 3z.

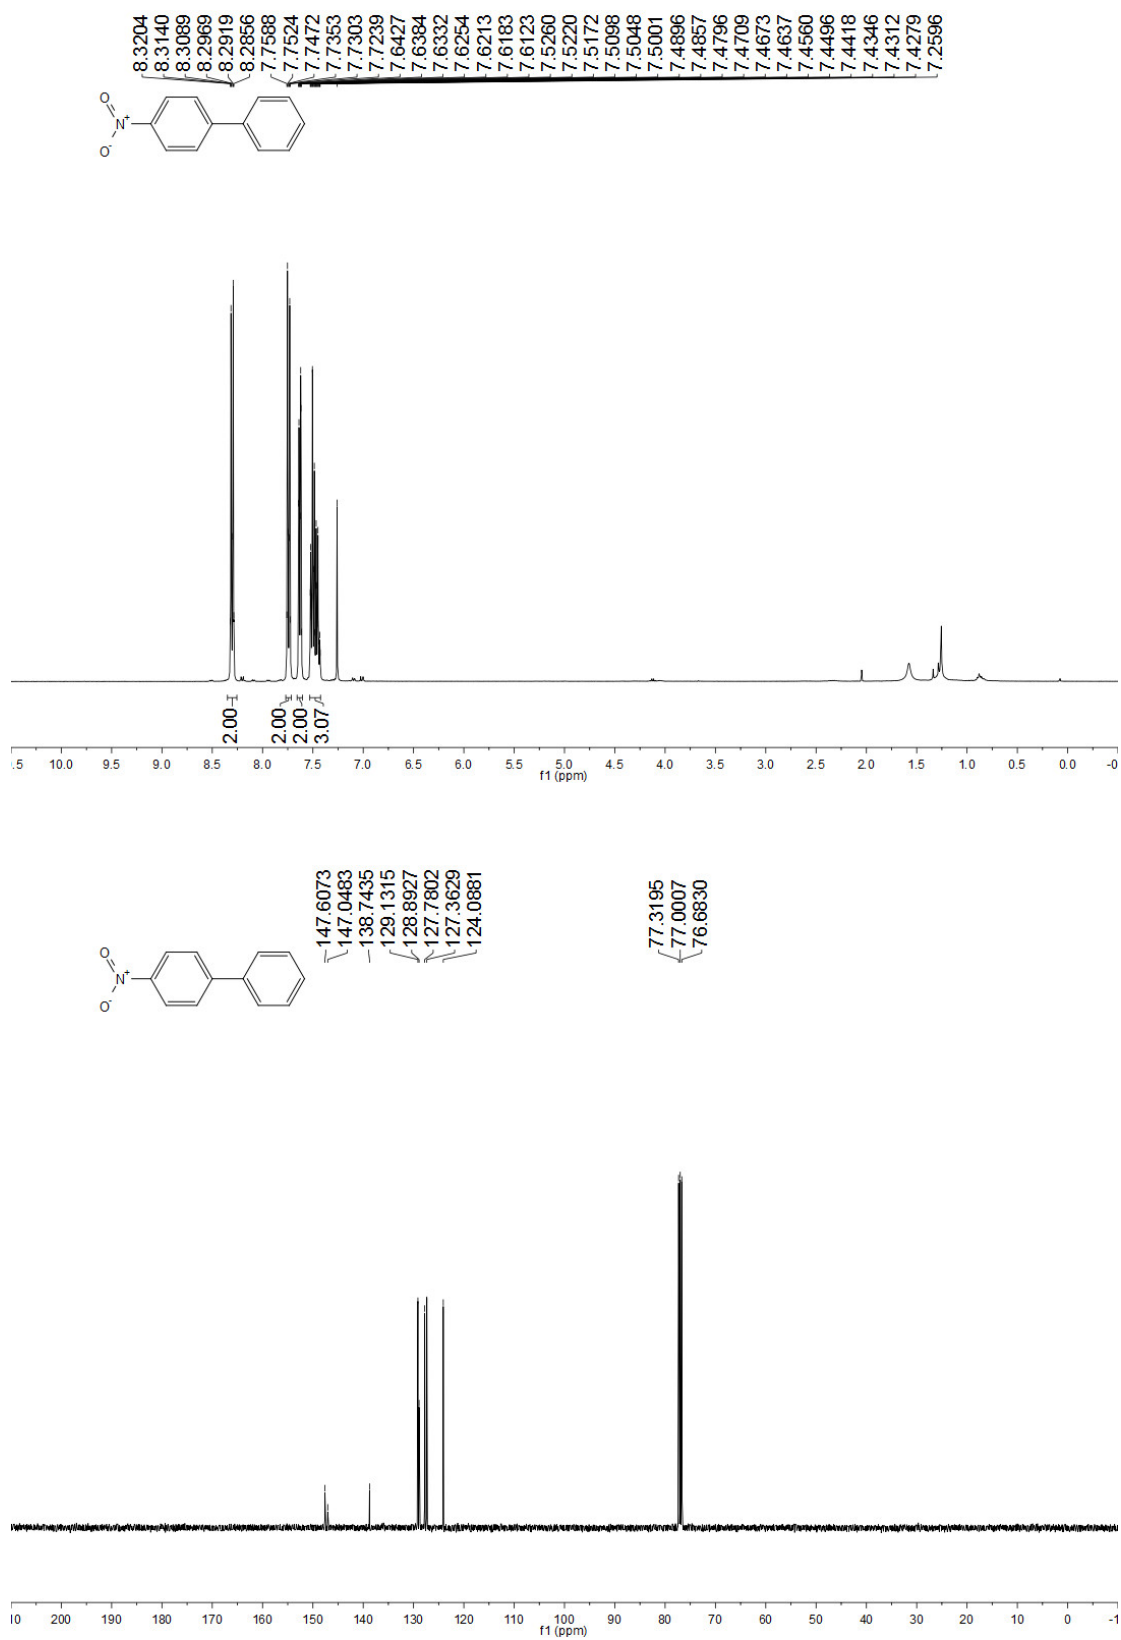

Figure S31. <sup>1</sup>H NMR and <sup>13</sup>C NMR spectra of 3aa.

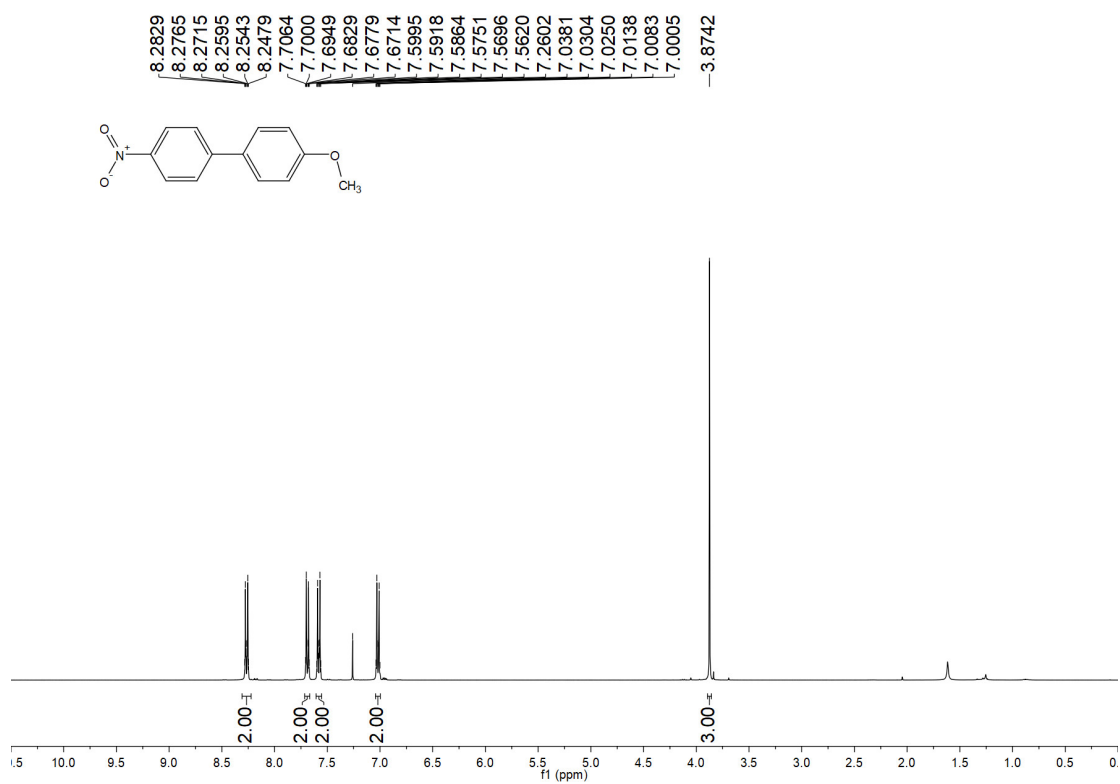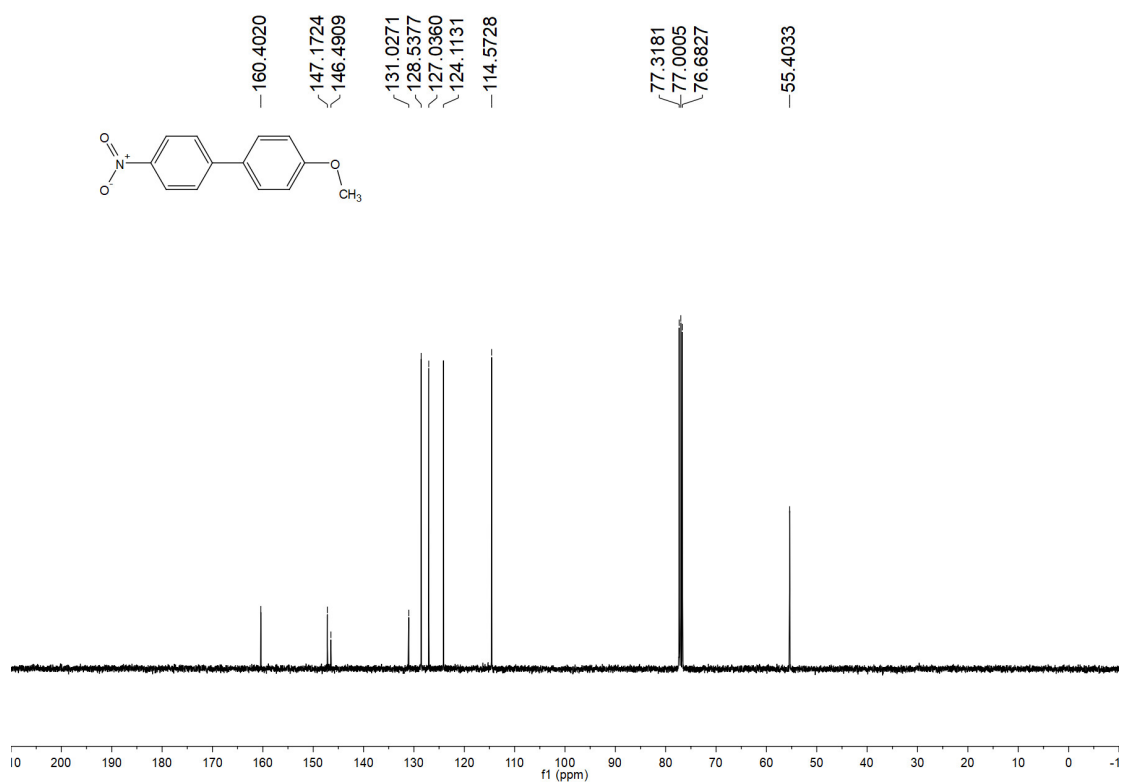

Figure S32. <sup>1</sup>H NMR and <sup>13</sup>C NMR spectra of 3ab.
